# Supplementary material for: Structure and tree species composition in different habitats of savanna used by indigenous people in the Northern Brazilian Amazon
Source: Biodivers Data J. 2017 Sep 28;(5):e20044. doi: 10.3897/BDJ.5.e20044 (PMC5665001; doi:10.3897/BDJ.5.e20044)
Supplement: Supplementary material 1 — DBS and Heights of individuals in non-forest (typical savanna) and forest habitats (riparian forest, forest island and buritizal) [file bdj-05-e20044-s001.xlsx]

## Sheet: Plan1
PARCELA	Localização	Tipo	Subparcela	No Individuo	Espécie	Família	CAP	DAP	H
A	Darora	Buritizal	1	1	Humiria_balsamifera	Humiriaceae	40	12.7324	8.5
A	Darora	Buritizal	1	2	Virola_molissima	Myristicaceae	38	12.0957	9
A	Darora	Buritizal	1	3	Tapirira_guianensis	Anacardiaceae	106	33.7408	11
A	Darora	Buritizal	1	4	Endlicheria_sp.	Lauraceae	49	15.5971	9
A	Darora	Buritizal	1	5	Alchornea_sp.	Euphorbiaceae	47	14.9605	9.5
A	Darora	Buritizal	1	6	Endlicheria_sp.	Lauraceae	49+45	21.1766	8
A	Darora	Buritizal	1	7	Hirtella_paniculata	Chrysobalanaceae	51	16.2338	7
A	Darora	Buritizal	1	8	Virola_molissima	Myristicaceae	33	10.5042	8.5
A	Darora	Buritizal	1	9	Virola_molissima	Myristicaceae	37	11.7774	10
A	Darora	Buritizal	1	10	Ormosia_sp	Fabaceae	46	14.6422	7
A	Darora	Buritizal	1	11	Virola_molissima	Myristicaceae	56	17.8253	10
A	Darora	Buritizal	1	12	Virola_molissima	Myristicaceae	33	10.5042	9.5
A	Darora	Buritizal	2	13	Endlicheria_sp.	Lauraceae	37	11.7774	6
A	Darora	Buritizal	2	14	Endlicheria_sp.	Lauraceae	40.5	12.8915	6
A	Darora	Buritizal	2	15	Endlicheria_sp.	Lauraceae	37	11.7774	10
A	Darora	Buritizal	2	16	Humiria_balsamifera	Humiriaceae	69	21.9633	5
A	Darora	Buritizal	2	17	Tapirira_guianensis	Anacardiaceae	84	26.738	15
A	Darora	Buritizal	2	18	Endlicheria_sp.	Lauraceae	62	19.7352	14
A	Darora	Buritizal	2	19	Endlicheria_sp.	Lauraceae	39	12.4141	16
A	Darora	Buritizal	2	20	Ormosia_sp	Fabaceae	62	19.7352	16
A	Darora	Buritizal	2	21	Tapirira_guianensis	Anacardiaceae	55	17.507	12
A	Darora	Buritizal	2	22	Tapirira_guianensis	Anacardiaceae	42	13.369	17
A	Darora	Buritizal	2	23	Tapirira_guianensis	Anacardiaceae	66	21.0084	17
A	Darora	Buritizal	2	24	Hirtella_paniculata	Chrysobalanaceae	32	10.1859	6
A	Darora	Buritizal	3	25	Trattinickia_rhoifolia	Burseraceae	97	30.876	16
A	Darora	Buritizal	3	26	Endlicheria_sp.	Lauraceae	51	16.2338	12
A	Darora	Buritizal	3	27	Virola_molissima	Myristicaceae	33	10.5042	8
A	Darora	Buritizal	3	28	Virola_molissima	Myristicaceae	40	12.7324	12
A	Darora	Buritizal	3	29	Virola_surinamensis	Myristicaceae	64	20.3718	15
A	Darora	Buritizal	3	30	Ormosia_sp	Fabaceae	40	12.7324	9
A	Darora	Buritizal	3	31	Tapirira_guianensis	Anacardiaceae	73	23.2366	3
A	Darora	Buritizal	3	32	Guateria_sp	Annonaceae	43	13.6873	13
A	Darora	Buritizal	3	33	Guateria_sp	Annonaceae	36	11.4591	8
A	Darora	Buritizal	3	34	Humiria_balsamifera	Humiriaceae	67	21.3267	18
A	Darora	Buritizal	3	35	Mauritia_flexuosa	Arecaceae	98	31.1943	15
A	Darora	Buritizal	3	36	Euterpe_precatoria	Arecaceae	30	9.54927	12
A	Darora	Buritizal	3	37	Mauritia_flexuosa	Arecaceae	53	16.8704	12
A	Darora	Buritizal	3	38	Mauritia_flexuosa	Arecaceae	64	20.3718	17
A	Darora	Buritizal	3	39	Mauritia_flexuosa	Arecaceae	68	21.645	17
A	Darora	Buritizal	3	40	Euterpe_precatoria	Arecaceae	32	10.1859	11
A	Darora	Buritizal	3	41	Euterpe_precatoria	Arecaceae	31	9.86758	12
A	Darora	Buritizal	3	42	Mauritia_flexuosa	Arecaceae	76	24.1915	16
A	Darora	Buritizal	3	43	Euterpe_precatoria	Arecaceae	30	9.54927	11
A	Darora	Buritizal	3	44	Mauritia_flexuosa	Arecaceae	75	23.8732	17
A	Darora	Buritizal	3	45	Mauritia_flexuosa	Arecaceae	76	24.1915	17
A	Darora	Buritizal	3	46	Euterpe_precatoria	Arecaceae	33	10.5042	15
A	Darora	Buritizal	3	47	Mauritia_flexuosa	Arecaceae	88	28.0112	17
A	Darora	Buritizal	4	48	Tapirira_guianensis	Anacardiaceae	33	10.5042	10
A	Darora	Buritizal	4	49	Tapirira_guianensis	Anacardiaceae	46	14.6422	12
A	Darora	Buritizal	4	50	Byrsonima_sp1	Malpighiaceae	34	10.8225	7
A	Darora	Buritizal	4	51	Virola_molissima	Myristicaceae	31	9.86758	8
A	Darora	Buritizal	4	52	Guateria_sp	Annonaceae	56	17.8253	12
A	Darora	Buritizal	4	53	Trattinickia_rhoifolia	Burseraceae	43	13.6873	8
A	Darora	Buritizal	4	54	Virola_molissima	Myristicaceae	42	13.369	8
A	Darora	Buritizal	4	55	Virola_molissima	Myristicaceae	32	10.1859	8
A	Darora	Buritizal	4	56	Ormosia_sp	Fabaceae	45.5	14.4831	12
A	Darora	Buritizal	4	57	Trattinickia_rhoifolia	Burseraceae	45	14.3239	14
A	Darora	Buritizal	4	58	Trattinickia_rhoifolia	Burseraceae	48	15.2788	14
A	Darora	Buritizal	4	59	Byrsonima_sp1	Malpighiaceae	40+57	22.1654	20
A	Darora	Buritizal	4	60	Ormosia_sp	Fabaceae	34	10.8225	15
A	Darora	Buritizal	4	61	Byrsonima_sp1	Malpighiaceae	47+48	21.3837	10
A	Darora	Buritizal	4	62	Ormosia_sp	Fabaceae	35	11.1408	10
A	Darora	Buritizal	4	63	Guateria_sp	Annonaceae	35	11.1408	12
A	Darora	Buritizal	4	64	Euterpe_precatoria	Arecaceae	33	10.5042	10
A	Darora	Buritizal	4	65	Mauritia_flexuosa	Arecaceae	102	32.4675	20
A	Darora	Buritizal	4	66	Euterpe_precatoria	Arecaceae	37	11.7774	20
A	Darora	Buritizal	4	67	Mauritia_flexuosa	Arecaceae	94	29.9211	20
A	Darora	Buritizal	5	68	Ormosia_sp	Fabaceae	34	10.8225	10
A	Darora	Buritizal	5	69	Malouetia_sp	Apocynaceae	33	10.5042	5
A	Darora	Buritizal	5	70	Malouetia_sp	Apocynaceae	33	10.5042	8
A	Darora	Buritizal	5	71	Trattinickia_rhoifolia	Burseraceae	87	27.6929	12
A	Darora	Buritizal	5	72	Trattinickia_rhoifolia	Burseraceae	67	21.3267	10
A	Darora	Buritizal	5	73	Malouetia_sp	Apocynaceae	35	11.1408	10
A	Darora	Buritizal	5	74	Tapirira_guianensis	Anacardiaceae	73+46+55	32.5704	16
A	Darora	Buritizal	5	75	Buchenavia_capitata	Combretaceae	33+47	18.28	10
A	Darora	Buritizal	5	76	Trattinickia_rhoifolia	Burseraceae	50	15.9155	12
A	Darora	Buritizal	5	77	Curatella_americana	Dilleniaceae	46	14.6422	7
A	Darora	Buritizal	5	78	Ormosia_sp	Fabaceae	61	19.4169	12
A	Darora	Buritizal	5	79	Ormosia_sp	Fabaceae	44	14.0056	10
A	Darora	Buritizal	5	80	Guateria_sp	Annonaceae	60	19.0985	14
A	Darora	Buritizal	5	81	Humiria_balsamifera	Humiriaceae	43	13.6873	14
A	Darora	Buritizal	5	82	Humiria_balsamifera	Humiriaceae	39	12.4141	14
A	Darora	Buritizal	5	83	Mauritia_flexuosa	Arecaceae	82	26.1013	18
A	Darora	Buritizal	5	84	Euterpe_precatoria	Arecaceae	30	9.54927	15
A	Darora	Buritizal	5	85	Mauritia_flexuosa	Arecaceae	114	36.2872	30
A	Darora	Buritizal	5	86	Mauritia_flexuosa	Arecaceae	102	32.4675	20
A	Darora	Buritizal	5	87	Euterpe_precatoria	Arecaceae	39	12.4141	14
A	Darora	Buritizal	5	88	Mauritia_flexuosa	Arecaceae	106	33.7408	30
A	Darora	Buritizal	6	89	Tapirira_guianensis	Anacardiaceae	77+55	30.1203	14
A	Darora	Buritizal	6	90	Endlicheria_sp.	Lauraceae	45	14.3239	12
A	Darora	Buritizal	6	91	Ormosia_sp	Fabaceae	55	17.507	10
A	Darora	Buritizal	6	92	Ormosia_sp	Fabaceae	50	15.9155	10
A	Darora	Buritizal	6	93	Caryocar_microcarpum	Caryocaraceae	89	28.3295	12
A	Darora	Buritizal	6	94	Guateria_sp	Annonaceae	21+45+13	16.3396	10
A	Darora	Buritizal	6	95	Ormosia_sp	Fabaceae	35.5	11.3	12
A	Darora	Buritizal	6	96	Tapirira_guianensis	Anacardiaceae	66	21.0084	12
A	Darora	Buritizal	6	97	Endlicheria_sp.	Lauraceae	73	23.2366	12
A	Darora	Buritizal	6	98	Tapirira_guianensis	Anacardiaceae	67	21.3267	8
A	Darora	Buritizal	7	99	Virola_surinamensis	Myristicaceae	85	27.0563	15
A	Darora	Buritizal	7	100	Guateria_sp	Annonaceae	43	13.6873	8
A	Darora	Buritizal	7	101	Guateria_sp	Annonaceae	36	11.4591	6
A	Darora	Buritizal	7	102	Virola_surinamensis	Myristicaceae	36	11.4591	10
A	Darora	Buritizal	7	103	Endlicheria_sp.	Lauraceae	42	13.369	10
A	Darora	Buritizal	7	104	Tapirira_guianensis	Anacardiaceae	54	17.1887	10
A	Darora	Buritizal	7	105	Amanoa_guianensis	Phyllantaceae	31.5	10.0267	8
A	Darora	Buritizal	7	106	Tapirira_guianensis	Anacardiaceae	75	23.8732	14
A	Darora	Buritizal	7	107	Tapirira_guianensis	Anacardiaceae	38	12.0957	10
A	Darora	Buritizal	7	108	Xylopia_aromatica	Annonaceae	37.5	11.9366	7
A	Darora	Buritizal	8	109	Virola_surinamensis	Myristicaceae	36	11.4591	10
A	Darora	Buritizal	8	110	Guateria_sp	Annonaceae	43	13.6873	8
A	Darora	Buritizal	8	111	Amanoa_guianensis	Phyllantaceae	60+25+37+26+35+21	28.3564	12
A	Darora	Buritizal	8	112	Amanoa_guianensis	Phyllantaceae	103	32.7858	14
A	Darora	Buritizal	8	113	Euterpe_precatoria	Arecaceae	39	12.4141	15
A	Darora	Buritizal	8	114	Euterpe_precatoria	Arecaceae	29	9.23097	12
A	Darora	Buritizal	8	115	Euterpe_precatoria	Arecaceae	45	14.3239	15
A	Darora	Buritizal	8	116	Mauritia_flexuosa	Arecaceae	100	31.8309	20
A	Darora	Buritizal	8	117	Mauritia_flexuosa	Arecaceae	79	25.1464	21
A	Darora	Buritizal	8	118	Mauritia_flexuosa	Arecaceae	69	21.9633	17
A	Darora	Buritizal	8	119	Mauritia_flexuosa	Arecaceae	104	33.1042	20
A	Darora	Buritizal	8	120	Mauritia_flexuosa	Arecaceae	118	37.5605	20
A	Darora	Buritizal	8	121	Mauritia_flexuosa	Arecaceae	70	22.2816	20
A	Darora	Buritizal	8	122	Mauritia_flexuosa	Arecaceae	102	32.4675	21
A	Darora	Buritizal	8	123	Mauritia_flexuosa	Arecaceae	99	31.5126	21
A	Darora	Buritizal	8	124	Mauritia_flexuosa	Arecaceae	66	21.0084	18
A	Darora	Buritizal	8	125	Euterpe_precatoria	Arecaceae	31	9.86758	10
A	Darora	Buritizal	8	126	Euterpe_precatoria	Arecaceae	40	12.7324	14
A	Darora	Buritizal	8	127	Euterpe_precatoria	Arecaceae	39	12.4141	15
A	Darora	Buritizal	8	128	Euterpe_precatoria	Arecaceae	30	9.54927	10
A	Darora	Buritizal	9	129	Alchornea_sp.	Euphorbiaceae	38	12.0957	8
A	Darora	Buritizal	9	130	Virola_surinamensis	Myristicaceae	40	12.7324	12
A	Darora	Buritizal	9	131	Endlicheria_sp.	Lauraceae	56+54	24.7628	14
A	Darora	Buritizal	9	132	Ormosia_sp	Fabaceae	51	16.2338	8
A	Darora	Buritizal	9	133	Alchornea_sp.	Euphorbiaceae	39	12.4141	8
A	Darora	Buritizal	9	134	Caryocar_microcarpum	Caryocaraceae	32	10.1859	10
A	Darora	Buritizal	9	135	Amanoa_guianensis	Phyllantaceae	76	24.1915	10
A	Darora	Buritizal	9	136	Ormosia_sp	Fabaceae	64	20.3718	10
A	Darora	Buritizal	9	137	Alchornea_sp.	Euphorbiaceae	57	18.1436	8
A	Darora	Buritizal	9	138	Endlicheria_sp.	Lauraceae	37	11.7774	6
A	Darora	Buritizal	10	139	Tapirira_guianensis	Anacardiaceae	73	23.2366	13
A	Darora	Buritizal	10	140	Humiria_balsamifera	Humiriaceae	62+44	24.1999	10
A	Darora	Buritizal	10	141	Endlicheria_sp.	Lauraceae	37	11.7774	10
A	Darora	Buritizal	10	142	Virola_molissima	Myristicaceae	35	11.1408	12
A	Darora	Buritizal	10	143	Guateria_sp	Annonaceae	22+42	15.0921	10
A	Darora	Buritizal	10	144	Alchornea_sp.	Euphorbiaceae	36	11.4591	8
A	Darora	Buritizal	10	145	Alchornea_sp.	Euphorbiaceae	35	11.1408	9
A	Darora	Buritizal	10	146	Mauritia_flexuosa	Arecaceae	87	27.6929	18
A	Darora	Buritizal	10	147	Mauritia_flexuosa	Arecaceae	87	27.6929	16
A	Darora	Buritizal	10	148	Mauritia_flexuosa	Arecaceae	88	28.0112	14
A	Darora	Buritizal	10	149	Mauritia_flexuosa	Arecaceae	53	16.8704	10
A	Darora	Buritizal	10	150	Euterpe_precatoria	Arecaceae	39	12.4141	15
B	Darora	Lavrado	1	1	Byrsonima_crassifolia	Malpighiaceae	19	6.04787	2
B	Darora	Lavrado	1	2	Byrsonima_crassifolia	Malpighiaceae	32	10.1859	3.5
B	Darora	Lavrado	1	3	Byrsonima_coccolobifolia	Malpighiaceae	28	8.91266	2.5
B	Darora	Lavrado	1	4	Byrsonima_verbascifolia	Malpighiaceae	10	3.18309	0.8
B	Darora	Lavrado	1	5	Byrsonima_crassifolia	Malpighiaceae	22	7.0028	1.6
B	Darora	Lavrado	1	6	Byrsonima_crassifolia	Malpighiaceae	11	3.5014	1
B	Darora	Lavrado	1	7	Byrsonima_crassifolia	Malpighiaceae	24	7.63942	2.2
B	Darora	Lavrado	1	8	Byrsonima_crassifolia	Malpighiaceae	14	4.45633	0.9
B	Darora	Lavrado	1	9	Byrsonima_coccolobifolia	Malpighiaceae	25	7.95773	2
B	Darora	Lavrado	1	10	Byrsonima_crassifolia	Malpighiaceae	22+10+10	7.69231	2
B	Darora	Lavrado	1	11	Byrsonima_coccolobifolia	Malpighiaceae	19+19	8.55301	1.7
B	Darora	Lavrado	1	12	Byrsonima_crassifolia	Malpighiaceae	14+11	5.66735	1.2
B	Darora	Lavrado	1	13	Byrsonima_crassifolia	Malpighiaceae	21	6.68449	2
B	Darora	Lavrado	1	14	Byrsonima_crassifolia	Malpighiaceae	19	6.04787	1.8
B	Darora	Lavrado	1	15	Byrsonima_crassifolia	Malpighiaceae	17	5.41126	1.9
B	Darora	Lavrado	1	16	Bowdichia_virgilioides	Fabaceae	16	5.09295	1.9
B	Darora	Lavrado	1	17	Byrsonima_crassifolia	Malpighiaceae	26	8.27604	1.8
B	Darora	Lavrado	1	18	Byrsonima_coccolobifolia	Malpighiaceae	11	3.5014	1
B	Darora	Lavrado	1	19	Palicourea_rigida	Rubiaceae	11	3.5014	0.7
B	Darora	Lavrado	1	20	Palicourea_rigida	Rubiaceae	6.5	2.06901	0.3
B	Darora	Lavrado	1	21	Palicourea_rigida	Rubiaceae	6.3	2.00535	0.5
B	Darora	Lavrado	1	22	Byrsonima_crassifolia	Malpighiaceae	12	3.81971	1.8
B	Darora	Lavrado	1	23	Byrsonima_coccolobifolia	Malpighiaceae	17	5.41126	1.7
B	Darora	Lavrado	1	24	Byrsonima_crassifolia	Malpighiaceae	31	9.86758	1.8
B	Darora	Lavrado	1	25	Byrsonima_crassifolia	Malpighiaceae	14	4.45633	1
B	Darora	Lavrado	1	26	Byrsonima_crassifolia	Malpighiaceae	37	11.7774	2.5
B	Darora	Lavrado	1	27	Byrsonima_crassifolia	Malpighiaceae	32	10.1859	3
B	Darora	Lavrado	1	28	Byrsonima_coccolobifolia	Malpighiaceae	27	8.59435	1.7
B	Darora	Lavrado	2	29	Byrsonima_verbascifolia	Malpighiaceae	12	3.81971	0.4
B	Darora	Lavrado	2	30	Byrsonima_coccolobifolia	Malpighiaceae	30	9.54927	2
B	Darora	Lavrado	2	31	Byrsonima_crassifolia	Malpighiaceae	13	4.13802	1.3
B	Darora	Lavrado	2	32	Byrsonima_crassifolia	Malpighiaceae	30	9.54927	2
B	Darora	Lavrado	2	33	Byrsonima_verbascifolia	Malpighiaceae	16	5.09295	0.6
B	Darora	Lavrado	2	34	Byrsonima_coccolobifolia	Malpighiaceae	37	11.7774	3
B	Darora	Lavrado	2	35	Byrsonima_crassifolia	Malpighiaceae	12	3.81971	1.6
B	Darora	Lavrado	2	36	Byrsonima_crassifolia	Malpighiaceae	16	5.09295	1.5
B	Darora	Lavrado	2	37	Byrsonima_verbascifolia	Malpighiaceae	13	4.13802	0.5
B	Darora	Lavrado	2	38	Byrsonima_coccolobifolia	Malpighiaceae	31	9.86758	1.7
B	Darora	Lavrado	2	39	Byrsonima_crassifolia	Malpighiaceae	12	3.81971	1
B	Darora	Lavrado	3	40	Byrsonima_crassifolia	Malpighiaceae	14+20+17	9.46938	1.8
B	Darora	Lavrado	3	41	Byrsonima_crassifolia	Malpighiaceae	12	3.81971	1
B	Darora	Lavrado	3	42	Byrsonima_crassifolia	Malpighiaceae	31	9.86758	2.5
B	Darora	Lavrado	3	43	Byrsonima_coccolobifolia	Malpighiaceae	41	13.0507	4
B	Darora	Lavrado	3	44	Byrsonima_crassifolia	Malpighiaceae	23	7.32111	1.8
B	Darora	Lavrado	3	45	Byrsonima_crassifolia	Malpighiaceae	31	9.86758	2
B	Darora	Lavrado	3	46	Byrsonima_crassifolia	Malpighiaceae	14	4.45633	1
B	Darora	Lavrado	3	47	Byrsonima_coccolobifolia	Malpighiaceae	18	5.72956	1.5
B	Darora	Lavrado	3	48	Byrsonima_crassifolia	Malpighiaceae	49	15.5971	5
B	Darora	Lavrado	3	49	Byrsonima_crassifolia	Malpighiaceae	21	6.68449	1.7
B	Darora	Lavrado	3	50	Byrsonima_crassifolia	Malpighiaceae	30	9.54927	2
B	Darora	Lavrado	3	51	Byrsonima_coccolobifolia	Malpighiaceae	13	4.13802	1.2
B	Darora	Lavrado	3	52	Byrsonima_crassifolia	Malpighiaceae	10	3.18309	1.2
B	Darora	Lavrado	3	53	Byrsonima_crassifolia	Malpighiaceae	30	9.54927	2
B	Darora	Lavrado	3	54	Byrsonima_crassifolia	Malpighiaceae	16	5.09295	1.6
B	Darora	Lavrado	3	55	Byrsonima_crassifolia	Malpighiaceae	32	10.1859	3
B	Darora	Lavrado	3	56	Byrsonima_crassifolia	Malpighiaceae	23	7.32111	1.8
B	Darora	Lavrado	3	57	Byrsonima_crassifolia	Malpighiaceae	13	4.13802	1.6
B	Darora	Lavrado	3	58	Byrsonima_coccolobifolia	Malpighiaceae	29	9.23097	2
B	Darora	Lavrado	3	59	Byrsonima_crassifolia	Malpighiaceae	38	12.0957	1.8
B	Darora	Lavrado	3	60	Byrsonima_crassifolia	Malpighiaceae	34	10.8225	2.3
B	Darora	Lavrado	3	61	Byrsonima_crassifolia	Malpighiaceae	40	12.7324	2.5
B	Darora	Lavrado	3	62	Byrsonima_crassifolia	Malpighiaceae	14	4.45633	1.2
B	Darora	Lavrado	3	63	Byrsonima_coccolobifolia	Malpighiaceae	9.5	3.02394	1.5
B	Darora	Lavrado	3	64	Byrsonima_coccolobifolia	Malpighiaceae	6	1.90985	1
B	Darora	Lavrado	3	65	Byrsonima_coccolobifolia	Malpighiaceae	8	2.54647	0.3
B	Darora	Lavrado	3	66	Byrsonima_coccolobifolia	Malpighiaceae	6	1.90985	0.6
B	Darora	Lavrado	3	67	Byrsonima_crassifolia	Malpighiaceae	41	13.0507	3
B	Darora	Lavrado	4	68	Byrsonima_crassifolia	Malpighiaceae	40	12.7324	1.5
B	Darora	Lavrado	4	69	Byrsonima_crassifolia	Malpighiaceae	17	5.41126	4
B	Darora	Lavrado	4	70	Himatanthus_articulatus	Apocynaceae	22	7.0028	3
B	Darora	Lavrado	4	71	Byrsonima_coccolobifolia	Malpighiaceae	6	1.90985	0.7
B	Darora	Lavrado	4	72	Byrsonima_crassifolia	Malpighiaceae	7.5	2.38732	1
B	Darora	Lavrado	4	73	Byrsonima_crassifolia	Malpighiaceae	43+38	18.2661	4
B	Darora	Lavrado	4	74	Byrsonima_crassifolia	Malpighiaceae	27	8.59435	3
B	Darora	Lavrado	5	75	Byrsonima_crassifolia	Malpighiaceae	27	8.59435	2.5
B	Darora	Lavrado	5	76	Byrsonima_crassifolia	Malpighiaceae	22	7.0028	1.8
B	Darora	Lavrado	5	77	Byrsonima_crassifolia	Malpighiaceae	34	10.8225	2
B	Darora	Lavrado	5	78	Byrsonima_crassifolia	Malpighiaceae	16	5.09295	1.8
B	Darora	Lavrado	5	79	Byrsonima_crassifolia	Malpighiaceae	26+21	10.6384	2.5
B	Darora	Lavrado	5	80	Byrsonima_coccolobifolia	Malpighiaceae	18	5.72956	1.7
B	Darora	Lavrado	5	81	Curatella_americana	Dilleniaceae	15	4.77464	1.7
B	Darora	Lavrado	5	82	Byrsonima_crassifolia	Malpighiaceae	18+13	7.06763	2
B	Darora	Lavrado	5	83	Byrsonima_crassifolia	Malpighiaceae	50	15.9155	2.5
B	Darora	Lavrado	5	84	Byrsonima_coccolobifolia	Malpighiaceae	27	8.59435	2
B	Darora	Lavrado	5	85	Byrsonima_crassifolia	Malpighiaceae	25	7.95773	1.8
B	Darora	Lavrado	5	86	Byrsonima_crassifolia	Malpighiaceae	24	7.63942	2.5
B	Darora	Lavrado	6	87	Palicourea_rigida	Rubiaceae	10	3.18309	0.9
B	Darora	Lavrado	6	88	Byrsonima_crassifolia	Malpighiaceae	14	4.45633	1.3
B	Darora	Lavrado	6	89	Byrsonima_crassifolia	Malpighiaceae	30	9.54927	2
B	Darora	Lavrado	6	90	Byrsonima_crassifolia	Malpighiaceae	19	6.04787	1
B	Darora	Lavrado	6	91	Byrsonima_crassifolia	Malpighiaceae	40	12.7324	2.5
B	Darora	Lavrado	6	92	Byrsonima_crassifolia	Malpighiaceae	35	11.1408	2.5
B	Darora	Lavrado	6	93	Byrsonima_crassifolia	Malpighiaceae	24	7.63942	2
B	Darora	Lavrado	6	94	Byrsonima_crassifolia	Malpighiaceae	23+22	10.1311	2.3
B	Darora	Lavrado	6	95	Byrsonima_crassifolia	Malpighiaceae	28	8.91266	2.5
B	Darora	Lavrado	6	96	Byrsonima_coccolobifolia	Malpighiaceae	7	2.22816	0.8
B	Darora	Lavrado	6	97	Byrsonima_crassifolia	Malpighiaceae	14	4.45633	1.5
B	Darora	Lavrado	6	98	Byrsonima_crassifolia	Malpighiaceae	21	6.68449	1.7
B	Darora	Lavrado	6	99	Byrsonima_crassifolia	Malpighiaceae	18	5.72956	1.8
B	Darora	Lavrado	7	100	Byrsonima_crassifolia	Malpighiaceae	24	7.63942	2
B	Darora	Lavrado	7	101	Byrsonima_coccolobifolia	Malpighiaceae	8	2.54647	0.4
B	Darora	Lavrado	7	102	Byrsonima_coccolobifolia	Malpighiaceae	8	2.54647	1
B	Darora	Lavrado	7	103	Byrsonima_coccolobifolia	Malpighiaceae	6.5	2.06901	1.3
B	Darora	Lavrado	7	104	Byrsonima_coccolobifolia	Malpighiaceae	9	2.86478	0.9
B	Darora	Lavrado	7	105	Byrsonima_coccolobifolia	Malpighiaceae	6.5	2.06901	0.7
B	Darora	Lavrado	7	106	Byrsonima_coccolobifolia	Malpighiaceae	9	2.86478	0.9
B	Darora	Lavrado	7	107	Byrsonima_coccolobifolia	Malpighiaceae	7	2.22816	0.4
B	Darora	Lavrado	7	108	Byrsonima_coccolobifolia	Malpighiaceae	7	2.22816	0.5
B	Darora	Lavrado	7	109	Byrsonima_crassifolia	Malpighiaceae	27	8.59435	1.7
B	Darora	Lavrado	7	110	Himatanthus_articulatus	Apocynaceae	53	16.8704	6
B	Darora	Lavrado	7	111	Byrsonima_crassifolia	Malpighiaceae	17+22	8.84993	1.8
B	Darora	Lavrado	7	112	Byrsonima_crassifolia	Malpighiaceae	23	7.32111	1.8
B	Darora	Lavrado	7	113	Byrsonima_crassifolia	Malpighiaceae	26	8.27604	2.5
B	Darora	Lavrado	7	114	Byrsonima_crassifolia	Malpighiaceae	15+13	6.31827	1.5
B	Darora	Lavrado	7	115	Byrsonima_coccolobifolia	Malpighiaceae	24	7.63942	2.3
B	Darora	Lavrado	7	116	Byrsonima_crassifolia	Malpighiaceae	17	5.41126	1.4
B	Darora	Lavrado	7	117	Byrsonima_crassifolia	Malpighiaceae	16	5.09295	1.7
B	Darora	Lavrado	7	118	Byrsonima_crassifolia	Malpighiaceae	17	5.41126	1.5
B	Darora	Lavrado	7	119	Byrsonima_crassifolia	Malpighiaceae	13	4.13802	1.2
B	Darora	Lavrado	7	120	Byrsonima_crassifolia	Malpighiaceae	24	7.63942	1.7
B	Darora	Lavrado	7	121	Byrsonima_crassifolia	Malpighiaceae	30+27	12.8473	2.5
B	Darora	Lavrado	8	122	Byrsonima_crassifolia	Malpighiaceae	16	5.09295	1.5
B	Darora	Lavrado	8	123	Byrsonima_crassifolia	Malpighiaceae	20+9	6.98108	1.8
B	Darora	Lavrado	8	124	Byrsonima_crassifolia	Malpighiaceae	13	4.13802	1.4
B	Darora	Lavrado	8	125	Byrsonima_crassifolia	Malpighiaceae	26	8.27604	2.3
B	Darora	Lavrado	8	126	Byrsonima_crassifolia	Malpighiaceae	18+13	7.06763	1.6
B	Darora	Lavrado	8	127	Byrsonima_crassifolia	Malpighiaceae	29+13	10.116	2.3
B	Darora	Lavrado	8	128	Byrsonima_coccolobifolia	Malpighiaceae	19	6.04787	1.8
B	Darora	Lavrado	8	129	Byrsonima_crassifolia	Malpighiaceae	28	8.91266	2.2
B	Darora	Lavrado	8	130	Byrsonima_crassifolia	Malpighiaceae	15	4.77464	1.6
B	Darora	Lavrado	8	131	Byrsonima_crassifolia	Malpighiaceae	17	5.41126	1.7
B	Darora	Lavrado	8	132	Byrsonima_crassifolia	Malpighiaceae	16	5.09295	1.7
B	Darora	Lavrado	8	133	Byrsonima_crassifolia	Malpighiaceae	23	7.32111	2
B	Darora	Lavrado	8	134	Byrsonima_crassifolia	Malpighiaceae	24	7.63942	2
B	Darora	Lavrado	8	135	Byrsonima_coccolobifolia	Malpighiaceae	30	9.54927	2.5
B	Darora	Lavrado	8	136	Byrsonima_coccolobifolia	Malpighiaceae	20	6.36618	1.8
B	Darora	Lavrado	8	137	Byrsonima_crassifolia	Malpighiaceae	24+14	8.8442	2.2
B	Darora	Lavrado	8	138	Byrsonima_crassifolia	Malpighiaceae	17	5.41126	2
B	Darora	Lavrado	9	139	Byrsonima_crassifolia	Malpighiaceae	15	4.77464	1.3
B	Darora	Lavrado	9	140	Byrsonima_crassifolia	Malpighiaceae	30	9.54927	2.5
B	Darora	Lavrado	9	141	Byrsonima_coccolobifolia	Malpighiaceae	6	1.90985	0.8
B	Darora	Lavrado	9	142	Byrsonima_coccolobifolia	Malpighiaceae	7	2.22816	0.5
B	Darora	Lavrado	9	143	Byrsonima_crassifolia	Malpighiaceae	34	10.8225	3.5
B	Darora	Lavrado	9	144	Byrsonima_crassifolia	Malpighiaceae	24	7.63942	2.3
B	Darora	Lavrado	9	145	Byrsonima_crassifolia	Malpighiaceae	31+19+22	13.5272	1.1
B	Darora	Lavrado	9	146	Byrsonima_crassifolia	Malpighiaceae	10	3.18309	1.2
B	Darora	Lavrado	9	147	Byrsonima_crassifolia	Malpighiaceae	11	3.5014	1.7
B	Darora	Lavrado	9	148	Byrsonima_crassifolia	Malpighiaceae	23+21	9.91371	2.5
B	Darora	Lavrado	9	149	Byrsonima_crassifolia	Malpighiaceae	24+25	11.0312	2.5
B	Darora	Lavrado	9	150	Byrsonima_crassifolia	Malpighiaceae	38	12.0957	1.6
B	Darora	Lavrado	9	151	Byrsonima_crassifolia	Malpighiaceae	13	4.13802	2.5
B	Darora	Lavrado	10	152	Byrsonima_crassifolia	Malpighiaceae	38	12.0957	2.5
B	Darora	Lavrado	10	153	Byrsonima_coccolobifolia	Malpighiaceae	7	2.22816	0.7
B	Darora	Lavrado	10	154	Byrsonima_coccolobifolia	Malpighiaceae	8.5	2.70563	0.8
B	Darora	Lavrado	10	155	Byrsonima_coccolobifolia	Malpighiaceae	8.5	2.70563	0.8
B	Darora	Lavrado	10	156	Byrsonima_coccolobifolia	Malpighiaceae	6	1.90985	0.5
B	Darora	Lavrado	10	157	Byrsonima_coccolobifolia	Malpighiaceae	7	2.22816	0.5
B	Darora	Lavrado	10	158	Palicourea_rigida	Rubiaceae	18	5.72956	1.8
B	Darora	Lavrado	10	159	Byrsonima_crassifolia	Malpighiaceae	21	6.68449	1.7
B	Darora	Lavrado	10	160	Byrsonima_coccolobifolia	Malpighiaceae	16+12	6.3662	1.5
B	Darora	Lavrado	10	161	Byrsonima_coccolobifolia	Malpighiaceae	27+21	10.8879	2
B	Darora	Lavrado	10	162	Byrsonima_crassifolia	Malpighiaceae	18	5.72956	1.7
B	Darora	Lavrado	10	163	Byrsonima_crassifolia	Malpighiaceae	15	4.77464	1.5
B	Darora	Lavrado	10	164	Byrsonima_crassifolia	Malpighiaceae	26	8.27604	2
B	Darora	Lavrado	10	165	Byrsonima_crassifolia	Malpighiaceae	17+13	6.81213	1.6
B	Darora	Lavrado	10	166	Byrsonima_crassifolia	Malpighiaceae	34	10.8225	2.8
B	Darora	Lavrado	10	167	Byrsonima_crassifolia	Malpighiaceae	25	7.95773	2
B	Darora	Lavrado	10	168	Byrsonima_crassifolia	Malpighiaceae	15	4.77464	0.5
C	Darora	Lavrado	1	1	Byrsonima_coccolobifolia	Malpighiaceae	15	4.77464	1.5
C	Darora	Lavrado	1	2	Byrsonima_crassifolia	Malpighiaceae	16	5.09295	1.5
C	Darora	Lavrado	1	3	Bowdichia_virgilioides	Fabaceae	6.5	2.06901	0.9
C	Darora	Lavrado	1	4	Byrsonima_coccolobifolia	Malpighiaceae	6	1.90985	1
C	Darora	Lavrado	1	5	Byrsonima_coccolobifolia	Malpighiaceae	7	2.22816	1.1
C	Darora	Lavrado	1	6	Byrsonima_coccolobifolia	Malpighiaceae	8	2.54647	0.8
C	Darora	Lavrado	1	7	Byrsonima_crassifolia	Malpighiaceae	7	2.22816	0.8
C	Darora	Lavrado	1	8	Byrsonima_coccolobifolia	Malpighiaceae	10	3.18309	0.6
C	Darora	Lavrado	1	9	Byrsonima_coccolobifolia	Malpighiaceae	7	2.22816	0.4
C	Darora	Lavrado	1	10	Palicourea_rigida	Rubiaceae	6	1.90985	0.4
C	Darora	Lavrado	1	11	Palicourea_rigida	Rubiaceae	6	1.90985	0.1
C	Darora	Lavrado	1	12	Palicourea_rigida	Rubiaceae	7	2.22816	0.3
C	Darora	Lavrado	1	13	Byrsonima_coccolobifolia	Malpighiaceae	12	3.81971	1.3
C	Darora	Lavrado	1	14	Byrsonima_crassifolia	Malpighiaceae	11	3.5014	1.6
C	Darora	Lavrado	1	15	Byrsonima_crassifolia	Malpighiaceae	17	5.41126	2
C	Darora	Lavrado	1	16	Byrsonima_coccolobifolia	Malpighiaceae	14	4.45633	1.7
C	Darora	Lavrado	1	17	Byrsonima_crassifolia	Malpighiaceae	16	5.09295	1.8
C	Darora	Lavrado	1	18	Byrsonima_coccolobifolia	Malpighiaceae	16+11	6.18046	1.8
C	Darora	Lavrado	1	19	Byrsonima_crassifolia	Malpighiaceae	20	6.36618	2
C	Darora	Lavrado	1	20	Byrsonima_coccolobifolia	Malpighiaceae	13	4.13802	0.9
C	Darora	Lavrado	1	21	Byrsonima_crassifolia	Malpighiaceae	14	4.45633	1.6
C	Darora	Lavrado	1	22	Byrsonima_coccolobifolia	Malpighiaceae	22	7.0028	2.5
C	Darora	Lavrado	1	23	Byrsonima_coccolobifolia	Malpighiaceae	19	6.04787	2.6
C	Darora	Lavrado	1	24	Byrsonima_crassifolia	Malpighiaceae	12	3.81971	1.5
C	Darora	Lavrado	1	25	Byrsonima_crassifolia	Malpighiaceae	14	4.45633	1.9
C	Darora	Lavrado	1	26	Byrsonima_crassifolia	Malpighiaceae	13+18	7.06763	0.8
C	Darora	Lavrado	2	27	Byrsonima_crassifolia	Malpighiaceae	17	5.41126	2.5
C	Darora	Lavrado	2	28	Bowdichia_virgilioides	Fabaceae	18	5.72956	2
C	Darora	Lavrado	2	29	Byrsonima_crassifolia	Malpighiaceae	18	5.72956	2.5
C	Darora	Lavrado	2	30	Byrsonima_coccolobifolia	Malpighiaceae	8.5	2.70563	0.6
C	Darora	Lavrado	2	31	Byrsonima_coccolobifolia	Malpighiaceae	6	1.90985	0.8
C	Darora	Lavrado	2	32	Byrsonima_coccolobifolia	Malpighiaceae	6	1.90985	0.7
C	Darora	Lavrado	2	33	Byrsonima_coccolobifolia	Malpighiaceae	6	1.90985	1
C	Darora	Lavrado	2	34	Byrsonima_verbascifolia	Malpighiaceae	8	2.54647	0.5
C	Darora	Lavrado	2	35	Bowdichia_virgilioides	Fabaceae	6	1.90985	0.8
C	Darora	Lavrado	2	36	Byrsonima_coccolobifolia	Malpighiaceae	13	4.13802	1.5
C	Darora	Lavrado	2	37	Byrsonima_coccolobifolia	Malpighiaceae	25	7.95773	2.5
C	Darora	Lavrado	2	38	Byrsonima_coccolobifolia	Malpighiaceae	14+10	5.47641	1.5
C	Darora	Lavrado	2	39	Byrsonima_coccolobifolia	Malpighiaceae	12	3.81971	1.5
C	Darora	Lavrado	2	40	Byrsonima_coccolobifolia	Malpighiaceae	27	8.59435	2.5
C	Darora	Lavrado	2	41	Byrsonima_crassifolia	Malpighiaceae	10	3.18309	1.5
C	Darora	Lavrado	2	42	Byrsonima_coccolobifolia	Malpighiaceae	37	11.7774	3
C	Darora	Lavrado	2	43	Byrsonima_crassifolia	Malpighiaceae	16	5.09295	1.7
C	Darora	Lavrado	2	44	Byrsonima_coccolobifolia	Malpighiaceae	17	5.41126	2
C	Darora	Lavrado	2	45	Byrsonima_crassifolia	Malpighiaceae	15	4.77464	2
C	Darora	Lavrado	2	46	Byrsonima_coccolobifolia	Malpighiaceae	16	5.09295	1.8
C	Darora	Lavrado	2	47	Byrsonima_coccolobifolia	Malpighiaceae	15	4.77464	1
C	Darora	Lavrado	2	48	Byrsonima_coccolobifolia	Malpighiaceae	15	4.77464	1.7
C	Darora	Lavrado	2	49	Byrsonima_crassifolia	Malpighiaceae	11	3.5014	1
C	Darora	Lavrado	2	50	Byrsonima_crassifolia	Malpighiaceae	15	4.77464	1.7
C	Darora	Lavrado	2	51	Byrsonima_crassifolia	Malpighiaceae	10	3.18309	0.5
C	Darora	Lavrado	2	52	Byrsonima_coccolobifolia	Malpighiaceae	19	6.04787	1.8
C	Darora	Lavrado	2	53	Palicourea_rigida	Rubiaceae	10	3.18309	1.5
C	Darora	Lavrado	3	54	Byrsonima_crassifolia	Malpighiaceae	43	13.6873	3
C	Darora	Lavrado	3	55	Byrsonima_coccolobifolia	Malpighiaceae	13	4.13802	1.6
C	Darora	Lavrado	3	56	Byrsonima_coccolobifolia	Malpighiaceae	23	7.32111	2.5
C	Darora	Lavrado	3	57	Byrsonima_coccolobifolia	Malpighiaceae	23	7.32111	2
C	Darora	Lavrado	3	58	Curatella_americana	Dilleniaceae	90	28.6478	4
C	Darora	Lavrado	3	59	Byrsonima_coccolobifolia	Malpighiaceae	12	3.81971	0.9
C	Darora	Lavrado	3	60	Byrsonima_crassifolia	Malpighiaceae	32+14	11.1181	2.3
C	Darora	Lavrado	3	61	Byrsonima_coccolobifolia	Malpighiaceae	18+7	6.14759	0.8
C	Darora	Lavrado	3	62	Bowdichia_virgilioides	Fabaceae	13	4.13802	0.4
C	Darora	Lavrado	3	63	Byrsonima_coccolobifolia	Malpighiaceae	12	3.81971	1.4
C	Darora	Lavrado	3	64	Byrsonima_coccolobifolia	Malpighiaceae	23	7.32111	1.8
C	Darora	Lavrado	4	65	Byrsonima_crassifolia	Malpighiaceae	11	3.5014	1.6
C	Darora	Lavrado	4	66	Byrsonima_crassifolia	Malpighiaceae	19	6.04787	2
C	Darora	Lavrado	4	67	Byrsonima_crassifolia	Malpighiaceae	8	2.54647	1
C	Darora	Lavrado	4	68	Byrsonima_coccolobifolia	Malpighiaceae	8	2.54647	0.8
C	Darora	Lavrado	4	69	Byrsonima_coccolobifolia	Malpighiaceae	6	1.90985	0.7
C	Darora	Lavrado	4	70	Byrsonima_crassifolia	Malpighiaceae	25+27	11.7128	3
C	Darora	Lavrado	4	71	Byrsonima_crassifolia	Malpighiaceae	17	5.41126	1.8
C	Darora	Lavrado	4	72	Byrsonima_crassifolia	Malpighiaceae	10	3.18309	0.6
C	Darora	Lavrado	4	73	Byrsonima_crassifolia	Malpighiaceae	22	7.0028	2.5
C	Darora	Lavrado	4	74	Byrsonima_coccolobifolia	Malpighiaceae	12	3.81971	1
C	Darora	Lavrado	4	75	Byrsonima_crassifolia	Malpighiaceae	31	9.86758	2.5
C	Darora	Lavrado	4	76	Bowdichia_virgilioides	Fabaceae	31	9.86758	4
C	Darora	Lavrado	4	77	Byrsonima_crassifolia	Malpighiaceae	27	8.59435	2
C	Darora	Lavrado	4	78	Byrsonima_coccolobifolia	Malpighiaceae	30	9.54927	3
C	Darora	Lavrado	4	79	Byrsonima_coccolobifolia	Malpighiaceae	12	3.81971	1.2
C	Darora	Lavrado	4	80	Byrsonima_coccolobifolia	Malpighiaceae	11	3.5014	1.7
C	Darora	Lavrado	4	81	Byrsonima_coccolobifolia	Malpighiaceae	13	4.13802	1.6
C	Darora	Lavrado	5	82	Byrsonima_crassifolia	Malpighiaceae	21	6.68449	2.5
C	Darora	Lavrado	5	83	Byrsonima_crassifolia	Malpighiaceae	18	5.72956	1.6
C	Darora	Lavrado	5	84	Byrsonima_crassifolia	Malpighiaceae	16	5.09295	1.7
C	Darora	Lavrado	5	85	Byrsonima_coccolobifolia	Malpighiaceae	21	6.68449	1.5
C	Darora	Lavrado	5	86	Byrsonima_coccolobifolia	Malpighiaceae	23	7.32111	2.2
C	Darora	Lavrado	5	87	Byrsonima_crassifolia	Malpighiaceae	30	9.54927	4
C	Darora	Lavrado	5	88	Byrsonima_crassifolia	Malpighiaceae	18	5.72956	2.3
C	Darora	Lavrado	5	89	Byrsonima_crassifolia	Malpighiaceae	13+16	6.56213	1.5
C	Darora	Lavrado	6	90	Curatella_americana	Dilleniaceae	17	5.41126	1.7
C	Darora	Lavrado	6	91	Byrsonima_coccolobifolia	Malpighiaceae	7	2.22816	0.9
C	Darora	Lavrado	6	92	Palicourea_rigida	Rubiaceae	7	2.22816	0.7
C	Darora	Lavrado	6	93	Byrsonima_crassifolia	Malpighiaceae	13	4.13802	1.8
C	Darora	Lavrado	6	94	Curatella_americana	Dilleniaceae	42	13.369	4
C	Darora	Lavrado	6	95	Byrsonima_crassifolia	Malpighiaceae	31	9.86758	3.5
C	Darora	Lavrado	6	96	Byrsonima_crassifolia	Malpighiaceae	39	12.4141	4
C	Darora	Lavrado	6	97	Byrsonima_crassifolia	Malpighiaceae	28	8.91266	3.5
C	Darora	Lavrado	6	98	Byrsonima_crassifolia	Malpighiaceae	28	8.91266	2
C	Darora	Lavrado	6	99	Byrsonima_coccolobifolia	Malpighiaceae	31	9.86758	4
C	Darora	Lavrado	6	100	Byrsonima_crassifolia	Malpighiaceae	11	3.5014	0.8
C	Darora	Lavrado	7	101	Byrsonima_coccolobifolia	Malpighiaceae	14	4.45633	1
C	Darora	Lavrado	7	102	Byrsonima_crassifolia	Malpighiaceae	10	3.18309	0.8
C	Darora	Lavrado	7	103	Byrsonima_crassifolia	Malpighiaceae	11	3.5014	1.4
C	Darora	Lavrado	7	104	Byrsonima_coccolobifolia	Malpighiaceae	7	2.22816	0.6
C	Darora	Lavrado	7	105	Byrsonima_coccolobifolia	Malpighiaceae	6	1.90985	0.5
C	Darora	Lavrado	7	106	Byrsonima_coccolobifolia	Malpighiaceae	7	2.22816	0.8
C	Darora	Lavrado	7	107	Byrsonima_coccolobifolia	Malpighiaceae	8	2.54647	0.8
C	Darora	Lavrado	7	108	Byrsonima_crassifolia	Malpighiaceae	7	2.22816	0.6
C	Darora	Lavrado	7	109	Byrsonima_crassifolia	Malpighiaceae	18	5.72956	2.5
C	Darora	Lavrado	7	110	Byrsonima_crassifolia	Malpighiaceae	27	8.59435	3
C	Darora	Lavrado	7	111	Bowdichia_virgilioides	Fabaceae	11	3.5014	1.4
C	Darora	Lavrado	7	112	Byrsonima_coccolobifolia	Malpighiaceae	31	9.86758	3.5
C	Darora	Lavrado	7	113	Palicourea_rigida	Rubiaceae	17	5.41126	1.3
C	Darora	Lavrado	7	114	Byrsonima_crassifolia	Malpighiaceae	14	4.45633	1.5
C	Darora	Lavrado	7	115	Byrsonima_crassifolia	Malpighiaceae	24	7.63942	2
C	Darora	Lavrado	7	116	Bowdichia_virgilioides	Fabaceae	67	21.3267	6
C	Darora	Lavrado	7	117	Byrsonima_crassifolia	Malpighiaceae	13	4.13802	1.8
C	Darora	Lavrado	7	118	Byrsonima_coccolobifolia	Malpighiaceae	14	4.45633	1
C	Darora	Lavrado	7	119	Byrsonima_coccolobifolia	Malpighiaceae	32	10.1859	2.3
C	Darora	Lavrado	7	120	Byrsonima_crassifolia	Malpighiaceae	32	10.1859	2
C	Darora	Lavrado	7	121	Byrsonima_crassifolia	Malpighiaceae	10	3.18309	1.2
C	Darora	Lavrado	8	122	Byrsonima_coccolobifolia	Malpighiaceae	19	6.04787	2
C	Darora	Lavrado	8	123	Byrsonima_verbascifolia	Malpighiaceae	6	1.90985	0.5
C	Darora	Lavrado	8	124	Byrsonima_coccolobifolia	Malpighiaceae	6	1.90985	0.4
C	Darora	Lavrado	8	125	Byrsonima_coccolobifolia	Malpighiaceae	15	4.77464	1.8
C	Darora	Lavrado	8	126	Byrsonima_coccolobifolia	Malpighiaceae	15	4.77464	1.8
C	Darora	Lavrado	8	127	Byrsonima_coccolobifolia	Malpighiaceae	23	7.32111	2.5
C	Darora	Lavrado	8	128	Byrsonima_coccolobifolia	Malpighiaceae	22	7.0028	2
C	Darora	Lavrado	8	129	Byrsonima_coccolobifolia	Malpighiaceae	24	7.63942	2.5
C	Darora	Lavrado	8	130	Byrsonima_crassifolia	Malpighiaceae	12	3.81971	1
C	Darora	Lavrado	8	131	Byrsonima_crassifolia	Malpighiaceae	19	6.04787	1.8
C	Darora	Lavrado	8	132	Byrsonima_coccolobifolia	Malpighiaceae	17	5.41126	0.9
C	Darora	Lavrado	8	133	Byrsonima_crassifolia	Malpighiaceae	27	8.59435	3
C	Darora	Lavrado	8	134	Byrsonima_crassifolia	Malpighiaceae	17	5.41126	1.6
C	Darora	Lavrado	8	135	Byrsonima_crassifolia	Malpighiaceae	21	6.68449	1.6
C	Darora	Lavrado	9	136	Byrsonima_crassifolia	Malpighiaceae	18+13	7.06763	1.6
C	Darora	Lavrado	9	137	Curatella_americana	Dilleniaceae	18	5.72956	1.8
C	Darora	Lavrado	9	138	Byrsonima_crassifolia	Malpighiaceae	13	4.13802	1.7
C	Darora	Lavrado	9	139	Byrsonima_crassifolia	Malpighiaceae	35	11.1408	3.5
C	Darora	Lavrado	9	140	Byrsonima_coccolobifolia	Malpighiaceae	23	7.32111	2.5
C	Darora	Lavrado	9	141	Byrsonima_coccolobifolia	Malpighiaceae	19	6.04787	1.8
C	Darora	Lavrado	9	142	Byrsonima_coccolobifolia	Malpighiaceae	7	2.22816	1.2
C	Darora	Lavrado	9	143	Bowdichia_virgilioides	Fabaceae	22	7.0028	2
C	Darora	Lavrado	9	144	Byrsonima_crassifolia	Malpighiaceae	16	5.09295	1.8
C	Darora	Lavrado	9	145	Curatella_americana	Dilleniaceae	17	5.41126	1.8
C	Darora	Lavrado	9	146	Byrsonima_crassifolia	Malpighiaceae	18	5.72956	1.7
C	Darora	Lavrado	9	147	Byrsonima_crassifolia	Malpighiaceae	12	3.81971	1
C	Darora	Lavrado	9	148	Curatella_americana	Dilleniaceae	48	15.2788	5
C	Darora	Lavrado	9	149	Byrsonima_coccolobifolia	Malpighiaceae	22+20	9.46403	2.3
C	Darora	Lavrado	9	150	Curatella_americana	Dilleniaceae	14	4.45633	1.2
C	Darora	Lavrado	10	151	Bowdichia_virgilioides	Fabaceae	30	9.54927	3
C	Darora	Lavrado	10	152	Byrsonima_crassifolia	Malpighiaceae	18	5.72956	1.7
C	Darora	Lavrado	10	153	Byrsonima_coccolobifolia	Malpighiaceae	18	5.72956	1.5
C	Darora	Lavrado	10	154	Byrsonima_crassifolia	Malpighiaceae	18	5.72956	2
C	Darora	Lavrado	10	155	Byrsonima_crassifolia	Malpighiaceae	18+21	8.80402	1.8
C	Darora	Lavrado	10	156	Byrsonima_coccolobifolia	Malpighiaceae	31	9.86758	2.5
C	Darora	Lavrado	10	157	Byrsonima_crassifolia	Malpighiaceae	21	6.68449	2.2
C	Darora	Lavrado	10	158	Byrsonima_coccolobifolia	Malpighiaceae	9	2.86478	0.9
C	Darora	Lavrado	10	159	Byrsonima_coccolobifolia	Malpighiaceae	7	2.22816	0.8
C	Darora	Lavrado	10	160	Byrsonima_coccolobifolia	Malpighiaceae	6	1.90985	0.7
C	Darora	Lavrado	10	161	Byrsonima_coccolobifolia	Malpighiaceae	20	6.36618	1.8
C	Darora	Lavrado	10	162	Himatanthus_articulatus	Apocynaceae	19	6.04787	0.8
C	Darora	Lavrado	10	163	Bowdichia_virgilioides	Fabaceae	36	11.4591	5
C	Darora	Lavrado	10	164	Byrsonima_crassifolia	Malpighiaceae	18	5.72956	1.7
C	Darora	Lavrado	10	165	Byrsonima_coccolobifolia	Malpighiaceae	17	5.41126	1.5
C	Darora	Lavrado	10	166	Byrsonima_crassifolia	Malpighiaceae	13	4.13802	1.2
C	Darora	Lavrado	10	167	Byrsonima_crassifolia	Malpighiaceae	10+17	6.27805	1.8
C	Darora	Lavrado	10	168	Byrsonima_crassifolia	Malpighiaceae	15	4.77464	0.8
D	Darora	Lavrado	1	1	Antonia_ovata	Loganiaceae	6	1.90985	1.5
D	Darora	Lavrado	1	2	Antonia_ovata	Loganiaceae	6	1.90985	1.1
D	Darora	Lavrado	1	3	Himatanthus_articulatus	Apocynaceae	6	1.90985	0.5
D	Darora	Lavrado	1	4	Roupala_montana	Proteaceae	6	1.90985	6.5
D	Darora	Lavrado	1	5	Roupala_montana	Proteaceae	8.5	2.70563	9
D	Darora	Lavrado	1	6	Byrsonima_crassifolia	Malpighiaceae	40	12.7324	4
D	Darora	Lavrado	1	7	Roupala_montana	Proteaceae	7	2.22816	7
D	Darora	Lavrado	1	8	Roupala_montana	Proteaceae	6	1.90985	5
D	Darora	Lavrado	1	9	Byrsonima_crassifolia	Malpighiaceae	10	3.18309	1
D	Darora	Lavrado	1	10	Curatella_americana	Dilleniaceae	16	5.09295	1.1
D	Darora	Lavrado	1	11	Himatanthus_articulatus	Apocynaceae	14	4.45633	1.7
D	Darora	Lavrado	1	12	Antonia_ovata	Loganiaceae	6.5	2.06901	1.7
D	Darora	Lavrado	1	13	Roupala_montana	Proteaceae	6,5+6	2.81574	5
D	Darora	Lavrado	1	14	Antonia_ovata	Loganiaceae	7	2.22816	1.8
D	Darora	Lavrado	1	15	Antonia_ovata	Loganiaceae	75	23.8732	1.8
D	Darora	Lavrado	1	16	Roupala_montana	Proteaceae	10.5	3.34225	0.4
D	Darora	Lavrado	1	17	Antonia_ovata	Loganiaceae	6.3	2.00535	1.5
D	Darora	Lavrado	1	18	Antonia_ovata	Loganiaceae	7.3	2.32366	1.5
D	Darora	Lavrado	1	19	Roupala_montana	Proteaceae	7	2.22816	3
D	Darora	Lavrado	1	20	Roupala_montana	Proteaceae	10	3.18309	1.6
D	Darora	Lavrado	1	21	Byrsonima_coccolobifolia	Malpighiaceae	8	2.54647	1.5
D	Darora	Lavrado	1	22	Himatanthus_articulatus	Apocynaceae	8.5	2.70563	0.3
D	Darora	Lavrado	1	23	Antonia_ovata	Loganiaceae	8	2.54647	1.6
D	Darora	Lavrado	1	24	Roupala_montana	Proteaceae	6	1.90985	1.3
D	Darora	Lavrado	1	25	Roupala_montana	Proteaceae	7	2.22816	0.5
D	Darora	Lavrado	1	26	Antonia_ovata	Loganiaceae	6.5	2.06901	0.6
D	Darora	Lavrado	1	27	Antonia_ovata	Loganiaceae	11.3	3.59689	1.85
D	Darora	Lavrado	1	28	Roupala_montana	Proteaceae	6.5	2.06901	1.2
D	Darora	Lavrado	1	29	Byrsonima_crassifolia	Malpighiaceae	8.5	2.70563	0.3
D	Darora	Lavrado	1	30	Antonia_ovata	Loganiaceae	8	2.54647	1.65
D	Darora	Lavrado	1	31	Antonia_ovata	Loganiaceae	6.5	2.06901	1.1
D	Darora	Lavrado	1	32	Antonia_ovata	Loganiaceae	6	1.90985	1.1
D	Darora	Lavrado	1	33	Antonia_ovata	Loganiaceae	8	2.54647	1.1
D	Darora	Lavrado	1	34	Antonia_ovata	Loganiaceae	9	2.86478	2
D	Darora	Lavrado	1	35	Antonia_ovata	Loganiaceae	7	2.22816	1.1
D	Darora	Lavrado	1	36	Roupala_montana	Proteaceae	8.5	2.70563	1
D	Darora	Lavrado	1	37	Roupala_montana	Proteaceae	6.5	2.06901	1.5
D	Darora	Lavrado	1	38	Byrsonima_crassifolia	Malpighiaceae	8	2.54647	1.3
D	Darora	Lavrado	1	39	Byrsonima_coccolobifolia	Malpighiaceae	12	3.81971	0.4
D	Darora	Lavrado	1	40	Byrsonima_coccolobifolia	Malpighiaceae	6,5+10	3.79644	0.4
D	Darora	Lavrado	1	41	Byrsonima_crassifolia	Malpighiaceae	7	2.22816	0.5
D	Darora	Lavrado	2	42	Antonia_ovata	Loganiaceae	6	1.90985	1
D	Darora	Lavrado	2	43	Byrsonima_crassifolia	Malpighiaceae	7+9	3.62929	2
D	Darora	Lavrado	2	44	Antonia_ovata	Loganiaceae	6	1.90985	1.5
D	Darora	Lavrado	2	45	Antonia_ovata	Loganiaceae	6	1.90985	1.3
D	Darora	Lavrado	2	46	Antonia_ovata	Loganiaceae	8	2.54647	1.3
D	Darora	Lavrado	2	47	Roupala_montana	Proteaceae	6	1.90985	0.4
D	Darora	Lavrado	2	48	Antonia_ovata	Loganiaceae	6	1.90985	1
D	Darora	Lavrado	2	49	Byrsonima_crassifolia	Malpighiaceae	8	2.54647	1
D	Darora	Lavrado	2	50	Antonia_ovata	Loganiaceae	7	2.22816	1.5
D	Darora	Lavrado	2	51	Roupala_montana	Proteaceae	9+11	4.52403	1.3
D	Darora	Lavrado	2	52	Roupala_montana	Proteaceae	6.3	2.00535	0.5
D	Darora	Lavrado	2	53	Curatella_americana	Dilleniaceae	9+10	4.28242	1.5
D	Darora	Lavrado	2	54	Antonia_ovata	Loganiaceae	7	2.22816	1.6
D	Darora	Lavrado	2	55	Antonia_ovata	Loganiaceae	6.5	2.06901	1.5
D	Darora	Lavrado	2	56	Antonia_ovata	Loganiaceae	7.5	2.38732	1.4
D	Darora	Lavrado	2	57	Antonia_ovata	Loganiaceae	8	2.54647	1.8
D	Darora	Lavrado	2	58	Antonia_ovata	Loganiaceae	6	1.90985	1.8
D	Darora	Lavrado	2	59	Roupala_montana	Proteaceae	7.5	2.38732	0.5
D	Darora	Lavrado	2	60	Roupala_montana	Proteaceae	6.3	2.00535	0.5
D	Darora	Lavrado	2	61	Roupala_montana	Proteaceae	7	2.22816	0.5
D	Darora	Lavrado	2	62	Roupala_montana	Proteaceae	11	3.5014	1.15
D	Darora	Lavrado	2	63	Roupala_montana	Proteaceae	7.5	2.38732	1.1
D	Darora	Lavrado	2	64	Byrsonima_crassifolia	Malpighiaceae	7+9,5	3.75619	0.5
D	Darora	Lavrado	2	65	Byrsonima_crassifolia	Malpighiaceae	6	1.90985	0.3
D	Darora	Lavrado	2	66	Roupala_montana	Proteaceae	9	2.86478	0.5
D	Darora	Lavrado	2	67	Antonia_ovata	Loganiaceae	7.5	2.38732	1.4
D	Darora	Lavrado	2	68	Roupala_montana	Proteaceae	7	2.22816	2.6
D	Darora	Lavrado	2	69	Roupala_montana	Proteaceae	17	5.41126	1.5
D	Darora	Lavrado	2	70	Roupala_montana	Proteaceae	10	3.18309	1.3
D	Darora	Lavrado	2	71	Bowdichia_virgilioides	Fabaceae	16.5	5.2521	1
D	Darora	Lavrado	2	72	Roupala_montana	Proteaceae	6,5+6	2.81574	0.5
D	Darora	Lavrado	2	73	Roupala_montana	Proteaceae	17,5+9+12	7.33668	1.3
D	Darora	Lavrado	2	74	Antonia_ovata	Loganiaceae	6	1.90985	1.3
D	Darora	Lavrado	2	75	Antonia_ovata	Loganiaceae	6	1.90985	1.3
D	Darora	Lavrado	2	76	Antonia_ovata	Loganiaceae	6.5	2.06901	1.5
D	Darora	Lavrado	2	77	Himatanthus_articulatus	Apocynaceae	10	3.18309	1
D	Darora	Lavrado	2	78	Himatanthus_articulatus	Apocynaceae	9	2.86478	1
D	Darora	Lavrado	3	79	Himatanthus_articulatus	Apocynaceae	21+18,5+12,5	9.7566	2
D	Darora	Lavrado	3	80	Antonia_ovata	Loganiaceae	7	2.22816	1.2
D	Darora	Lavrado	3	81	Antonia_ovata	Loganiaceae	7.5	2.38732	2
D	Darora	Lavrado	3	82	Antonia_ovata	Loganiaceae	8	2.54647	2.4
D	Darora	Lavrado	3	83	Antonia_ovata	Loganiaceae	9+9	3.05727	2
D	Darora	Lavrado	3	84	Antonia_ovata	Loganiaceae	11	3.5014	2
D	Darora	Lavrado	3	85	Himatanthus_articulatus	Apocynaceae	14	4.45633	1.3
D	Darora	Lavrado	3	86	Antonia_ovata	Loganiaceae	6.3	2.00535	1.5
D	Darora	Lavrado	3	87	Palicourea_rigida	Rubiaceae	7+8,5	3.50502	0.5
D	Darora	Lavrado	3	88	Curatella_americana	Dilleniaceae	16+6	5.43928	0.6
D	Darora	Lavrado	3	89	Bowdichia_virgilioides	Fabaceae	13.5	4.29717	1
D	Darora	Lavrado	3	90	Byrsonima_crassifolia	Malpighiaceae	7	2.22816	1.5
D	Darora	Lavrado	3	91	Antonia_ovata	Loganiaceae	7	2.22816	1.4
D	Darora	Lavrado	3	92	Antonia_ovata	Loganiaceae	7+8+7	4.05142	1.5
D	Darora	Lavrado	3	93	Antonia_ovata	Loganiaceae	6	1.90985	0.5
D	Darora	Lavrado	3	94	Antonia_ovata	Loganiaceae	6	1.90985	1.6
D	Darora	Lavrado	3	95	Antonia_ovata	Loganiaceae	6	1.90985	0.5
D	Darora	Lavrado	3	96	Antonia_ovata	Loganiaceae	6+7,5	3.05727	2
D	Darora	Lavrado	3	97	Antonia_ovata	Loganiaceae	7+7+6+7	4.30602	1.5
D	Darora	Lavrado	3	98	Antonia_ovata	Loganiaceae	7	2.22816	1.8
D	Darora	Lavrado	3	99	Himatanthus_articulatus	Apocynaceae	7	2.22816	0.5
D	Darora	Lavrado	3	100	Himatanthus_articulatus	Apocynaceae	6	1.90985	0.5
D	Darora	Lavrado	3	101	Antonia_ovata	Loganiaceae	9	2.86478	2
D	Darora	Lavrado	3	102	Antonia_ovata	Loganiaceae	7+7	3.15111	1
D	Darora	Lavrado	3	103	Antonia_ovata	Loganiaceae	10.5	3.34225	1.8
D	Darora	Lavrado	3	104	Antonia_ovata	Loganiaceae	7	2.22816	1.5
D	Darora	Lavrado	3	105	Antonia_ovata	Loganiaceae	6	1.90985	1.5
D	Darora	Lavrado	3	106	Antonia_ovata	Loganiaceae	6	1.90985	1.4
D	Darora	Lavrado	3	107	Roupala_montana	Proteaceae	6	1.90985	0.5
D	Darora	Lavrado	3	108	Antonia_ovata	Loganiaceae	6	1.90985	1.5
D	Darora	Lavrado	3	109	Antonia_ovata	Loganiaceae	6	1.90985	1.5
D	Darora	Lavrado	3	110	Roupala_montana	Proteaceae	7+6,5	3.04065	0.6
D	Darora	Lavrado	3	111	Roupala_montana	Proteaceae	15.5	4.93379	1.6
D	Darora	Lavrado	4	112	Roupala_montana	Proteaceae	21	6.68449	1.4
D	Darora	Lavrado	4	113	Antonia_ovata	Loganiaceae	7.5	2.38732	1.75
D	Darora	Lavrado	4	114	Antonia_ovata	Loganiaceae	7.5	2.38732	1.75
D	Darora	Lavrado	4	115	Antonia_ovata	Loganiaceae	8	2.54647	1.75
D	Darora	Lavrado	4	116	Antonia_ovata	Loganiaceae	8	2.54647	1.75
D	Darora	Lavrado	4	117	Byrsonima_coccolobifolia	Malpighiaceae	14	4.45633	0.5
D	Darora	Lavrado	4	118	Antonia_ovata	Loganiaceae	6.3	2.00535	1
D	Darora	Lavrado	4	119	Roupala_montana	Proteaceae	16	5.09295	1.7
D	Darora	Lavrado	4	120	Roupala_montana	Proteaceae	14	4.45633	1.7
D	Darora	Lavrado	4	121	Roupala_montana	Proteaceae	8+11	4.32948	1
D	Darora	Lavrado	4	122	Antonia_ovata	Loganiaceae	6	1.90985	1.5
D	Darora	Lavrado	4	123	Antonia_ovata	Loganiaceae	6.3	2.00535	1.5
D	Darora	Lavrado	4	124	Antonia_ovata	Loganiaceae	6	1.90985	1.5
D	Darora	Lavrado	5	125	Curatella_americana	Dilleniaceae	8	2.54647	0.5
D	Darora	Lavrado	5	126	Himatanthus_articulatus	Apocynaceae	6.5	2.06901	0.5
D	Darora	Lavrado	5	127	Himatanthus_articulatus	Apocynaceae	6	1.90985	0.5
D	Darora	Lavrado	5	128	Roupala_montana	Proteaceae	6.5	2.06901	1
D	Darora	Lavrado	5	129	Roupala_montana	Proteaceae	8.4	2.6738	1
D	Darora	Lavrado	5	130	Roupala_montana	Proteaceae	6.3	2.00535	0.5
D	Darora	Lavrado	5	131	Roupala_montana	Proteaceae	25+16	9.44796	2
D	Darora	Lavrado	5	132	Bowdichia_virgilioides	Fabaceae	8	2.54647	0.5
D	Darora	Lavrado	5	133	Antonia_ovata	Loganiaceae	9	2.86478	1.5
D	Darora	Lavrado	5	134	Byrsonima_crassifolia	Malpighiaceae	11+15,3	5.99818	1.4
D	Darora	Lavrado	5	135	Antonia_ovata	Loganiaceae	6	1.90985	0.5
D	Darora	Lavrado	5	136	Antonia_ovata	Loganiaceae	6	1.90985	0.5
D	Darora	Lavrado	5	137	Antonia_ovata	Loganiaceae	6.5	2.06901	1.6
D	Darora	Lavrado	5	138	Antonia_ovata	Loganiaceae	7	2.22816	1.6
D	Darora	Lavrado	5	139	Antonia_ovata	Loganiaceae	6	1.90985	1.6
D	Darora	Lavrado	5	140	Antonia_ovata	Loganiaceae	6	1.90985	1.6
D	Darora	Lavrado	5	141	Palicourea_rigida	Rubiaceae	6+6	2.70095	0.5
D	Darora	Lavrado	5	142	Roupala_montana	Proteaceae	7	2.22816	1
D	Darora	Lavrado	5	143	Roupala_montana	Proteaceae	16	5.09295	0.5
D	Darora	Lavrado	5	144	Roupala_montana	Proteaceae	8	2.54647	0.5
D	Darora	Lavrado	5	145	Byrsonima_crassifolia	Malpighiaceae	6.3	2.00535	0.5
D	Darora	Lavrado	5	146	Byrsonima_crassifolia	Malpighiaceae	6	1.90985	0.5
D	Darora	Lavrado	5	147	Antonia_ovata	Loganiaceae	9.5	3.02394	0.5
D	Darora	Lavrado	5	148	Antonia_ovata	Loganiaceae	10+9+6+9+7+8	6.45314	2
D	Darora	Lavrado	5	149	Roupala_montana	Proteaceae	20	6.36618	2
D	Darora	Lavrado	5	150	Byrsonima_crassifolia	Malpighiaceae	13	4.13802	0.5
D	Darora	Lavrado	5	151	Antonia_ovata	Loganiaceae	7	2.22816	1.5
D	Darora	Lavrado	5	152	Curatella_americana	Dilleniaceae	38	12.0957	3
D	Darora	Lavrado	5	153	Antonia_ovata	Loganiaceae	6.5	2.06901	0.5
D	Darora	Lavrado	5	154	Roupala_montana	Proteaceae	15	4.77464	0.5
D	Darora	Lavrado	5	155	Byrsonima_verbascifolia	Malpighiaceae	7	2.22816	0.2
D	Darora	Lavrado	5	156	Antonia_ovata	Loganiaceae	8	2.54647	1.5
D	Darora	Lavrado	5	157	Antonia_ovata	Loganiaceae	7	2.22816	1.5
D	Darora	Lavrado	5	158	Antonia_ovata	Loganiaceae	6.5	2.06901	1.5
D	Darora	Lavrado	6	159	Antonia_ovata	Loganiaceae	7	2.22816	0.5
D	Darora	Lavrado	6	160	Antonia_ovata	Loganiaceae	6	1.90985	0.5
D	Darora	Lavrado	6	161	Antonia_ovata	Loganiaceae	6	1.90985	1.5
D	Darora	Lavrado	6	162	Roupala_montana	Proteaceae	9	2.86478	1
D	Darora	Lavrado	6	163	Roupala_montana	Proteaceae	9	2.86478	0.5
D	Darora	Lavrado	6	164	Roupala_montana	Proteaceae	9	2.86478	0.5
D	Darora	Lavrado	6	165	Byrsonima_coccolobifolia	Malpighiaceae	10+9+8	4.98234	1.25
D	Darora	Lavrado	6	166	Roupala_montana	Proteaceae	7	2.22816	1.3
D	Darora	Lavrado	6	167	Roupala_montana	Proteaceae	12	3.81971	1.2
D	Darora	Lavrado	6	168	Roupala_montana	Proteaceae	7	2.22816	1
D	Darora	Lavrado	6	169	Roupala_montana	Proteaceae	7	2.22816	1.5
D	Darora	Lavrado	6	170	Antonia_ovata	Loganiaceae	10	3.18309	2
D	Darora	Lavrado	6	171	Antonia_ovata	Loganiaceae	7	2.22816	0.5
D	Darora	Lavrado	6	172	Antonia_ovata	Loganiaceae	8	2.54647	1.4
D	Darora	Lavrado	6	173	Roupala_montana	Proteaceae	8+8	3.60127	0.5
D	Darora	Lavrado	6	174	Roupala_montana	Proteaceae	19+25	9.99513	2
D	Darora	Lavrado	6	175	Bowdichia_virgilioides	Fabaceae	15	4.77464	1.5
D	Darora	Lavrado	7	176	Byrsonima_coccolobifolia	Malpighiaceae	14	4.45633	0.5
D	Darora	Lavrado	7	177	Roupala_montana	Proteaceae	18	5.72956	0.5
D	Darora	Lavrado	7	178	Roupala_montana	Proteaceae	11	3.5014	0.5
D	Darora	Lavrado	7	179	Palicourea_rigida	Rubiaceae	9	2.86478	0.8
D	Darora	Lavrado	7	180	Palicourea_rigida	Rubiaceae	7	2.22816	0.5
D	Darora	Lavrado	7	181	Byrsonima_crassifolia	Malpighiaceae	11+8	4.32948	0.5
D	Darora	Lavrado	7	182	Antonia_ovata	Loganiaceae	11	3.5014	2
D	Darora	Lavrado	7	183	Roupala_montana	Proteaceae	6+8	3.1831	1.5
D	Darora	Lavrado	7	184	Antonia_ovata	Loganiaceae	10	3.18309	1.65
D	Darora	Lavrado	7	185	Roupala_montana	Proteaceae	7+9,5	3.75619	0.5
D	Darora	Lavrado	7	186	Roupala_montana	Proteaceae	9	2.86478	1
D	Darora	Lavrado	7	187	Antonia_ovata	Loganiaceae	6	1.90985	1
D	Darora	Lavrado	7	188	Antonia_ovata	Loganiaceae	6	1.90985	1
D	Darora	Lavrado	7	189	Byrsonima_crassifolia	Malpighiaceae	7+8	3.38368	0.5
D	Darora	Lavrado	7	190	Roupala_montana	Proteaceae	9	2.86478	0.5
D	Darora	Lavrado	7	191	Roupala_montana	Proteaceae	20	6.36618	1
D	Darora	Lavrado	7	192	Roupala_montana	Proteaceae	14+6	4.84835	1
D	Darora	Lavrado	7	193	Byrsonima_crassifolia	Malpighiaceae	10	3.18309	0.5
D	Darora	Lavrado	7	194	Roupala_montana	Proteaceae	15	4.77464	1.5
D	Darora	Lavrado	7	195	Antonia_ovata	Loganiaceae	8	2.54647	1.65
D	Darora	Lavrado	7	196	Antonia_ovata	Loganiaceae	8	2.54647	1.65
D	Darora	Lavrado	8	197	Roupala_montana	Proteaceae	10	3.18309	1.6
D	Darora	Lavrado	8	198	Antonia_ovata	Loganiaceae	7	2.22816	0.6
D	Darora	Lavrado	8	199	Byrsonima_crassifolia	Malpighiaceae	9	2.86478	0.5
D	Darora	Lavrado	8	200	Byrsonima_crassifolia	Malpighiaceae	9.5	3.02394	0.5
D	Darora	Lavrado	8	201	Antonia_ovata	Loganiaceae	6+7	2.93467	0.4
D	Darora	Lavrado	8	202	Antonia_ovata	Loganiaceae	6	1.90985	1
D	Darora	Lavrado	8	203	Antonia_ovata	Loganiaceae	7	2.22816	1
D	Darora	Lavrado	8	204	Antonia_ovata	Loganiaceae	7	2.22816	1
D	Darora	Lavrado	8	205	Byrsonima_crassifolia	Malpighiaceae	11	3.5014	1.5
D	Darora	Lavrado	8	206	Antonia_ovata	Loganiaceae	8	2.54647	1.5
D	Darora	Lavrado	8	207	Palicourea_rigida	Rubiaceae	8	2.54647	0.5
D	Darora	Lavrado	8	208	Antonia_ovata	Loganiaceae	6	1.90985	1.5
D	Darora	Lavrado	8	209	Roupala_montana	Proteaceae	8.5	2.70563	0.65
D	Darora	Lavrado	8	210	Antonia_ovata	Loganiaceae	9	2.86478	1.2
D	Darora	Lavrado	8	211	Roupala_montana	Proteaceae	15,5+10	5.8715	1.4
D	Darora	Lavrado	8	212	Roupala_montana	Proteaceae	9	2.86478	0.5
D	Darora	Lavrado	8	213	Roupala_montana	Proteaceae	8+8	3.60127	0.7
D	Darora	Lavrado	8	214	Antonia_ovata	Loganiaceae	7+7	3.15111	1.6
D	Darora	Lavrado	8	215	Himatanthus_articulatus	Apocynaceae	6	1.90985	0.5
D	Darora	Lavrado	9	216	Antonia_ovata	Loganiaceae	7	2.22816	1.6
D	Darora	Lavrado	9	217	Byrsonima_crassifolia	Malpighiaceae	9	2.86478	0.5
D	Darora	Lavrado	9	218	Roupala_montana	Proteaceae	12	3.81971	0.5
D	Darora	Lavrado	9	219	Roupala_montana	Proteaceae	12	3.81971	0.6
D	Darora	Lavrado	9	220	Antonia_ovata	Loganiaceae	7	2.22816	1.5
D	Darora	Lavrado	9	221	Roupala_montana	Proteaceae	14	4.45633	1.5
D	Darora	Lavrado	9	222	Bowdichia_virgilioides	Fabaceae	24	7.63942	1.6
D	Darora	Lavrado	9	223	Bowdichia_virgilioides	Fabaceae	20	6.36618	0.6
D	Darora	Lavrado	9	224	Byrsonima_crassifolia	Malpighiaceae	11	3.5014	0.5
D	Darora	Lavrado	9	225	Byrsonima_crassifolia	Malpighiaceae	11	3.5014	0.5
D	Darora	Lavrado	9	226	Byrsonima_crassifolia	Malpighiaceae	15	4.77464	1.5
D	Darora	Lavrado	9	227	Byrsonima_coccolobifolia	Malpighiaceae	10+9,5	4.39048	0.5
D	Darora	Lavrado	9	228	Antonia_ovata	Loganiaceae	7+17+7	6.26189	1
D	Darora	Lavrado	9	229	Antonia_ovata	Loganiaceae	7	2.22816	1
D	Darora	Lavrado	9	230	Byrsonima_crassifolia	Malpighiaceae	6	1.90985	0.6
D	Darora	Lavrado	9	231	Byrsonima_coccolobifolia	Malpighiaceae	8+8	3.60127	1.5
D	Darora	Lavrado	9	232	Byrsonima_coccolobifolia	Malpighiaceae	11	3.5014	1.5
D	Darora	Lavrado	9	233	Bowdichia_virgilioides	Fabaceae	7	2.22816	0.5
D	Darora	Lavrado	9	234	Antonia_ovata	Loganiaceae	6	1.90985	1.5
D	Darora	Lavrado	9	235	Antonia_ovata	Loganiaceae	8	2.54647	1.6
D	Darora	Lavrado	9	236	Antonia_ovata	Loganiaceae	6	1.90985	1.5
D	Darora	Lavrado	10	237	Byrsonima_verbascifolia	Malpighiaceae	6	1.90985	0.2
D	Darora	Lavrado	10	238	Antonia_ovata	Loganiaceae	7	2.22816	1.5
D	Darora	Lavrado	10	239	Roupala_montana	Proteaceae	18	5.72956	1.6
D	Darora	Lavrado	10	240	Roupala_montana	Proteaceae	7	2.22816	1.3
D	Darora	Lavrado	10	241	Roupala_montana	Proteaceae	15	4.77464	1.5
D	Darora	Lavrado	10	242	Antonia_ovata	Loganiaceae	7+6+8	3.88547	1.5
D	Darora	Lavrado	10	243	Roupala_montana	Proteaceae	12	3.81971	1.5
D	Darora	Lavrado	10	244	Byrsonima_crassifolia	Malpighiaceae	6.5	2.06901	0.5
D	Darora	Lavrado	10	245	Palicourea_rigida	Rubiaceae	7	2.22816	0.4
D	Darora	Lavrado	10	246	Roupala_montana	Proteaceae	25	7.95773	1.5
D	Darora	Lavrado	10	247	Roupala_montana	Proteaceae	12	3.81971	0.5
D	Darora	Lavrado	10	248	Roupala_montana	Proteaceae	10	3.18309	0.5
D	Darora	Lavrado	10	249	Roupala_montana	Proteaceae	14	4.45633	0.5
D	Darora	Lavrado	10	250	Roupala_montana	Proteaceae	15	4.77464	0.5
D	Darora	Lavrado	10	251	Roupala_montana	Proteaceae	6	1.90985	0.5
D	Darora	Lavrado	10	252	Antonia_ovata	Loganiaceae	7,5+6	3.05727	1.6
D	Darora	Lavrado	10	253	Roupala_montana	Proteaceae	6	1.90985	0.5
D	Darora	Lavrado	10	254	Roupala_montana	Proteaceae	20	6.36618	1.5
D	Darora	Lavrado	10	255	Antonia_ovata	Loganiaceae	9	2.86478	1.6
E	Darora	Mata Ciliar	1	1	Couepia multiflora	Chrysobalanaceae	104+23	33.9041	6
E	Darora	Mata Ciliar	1	2	Swartzia	Fabaceae	56	17.8253	8
E	Darora	Mata Ciliar	1	3	Cassia_moschata	Fabaceae	81	25.783	5
E	Darora	Mata Ciliar	1	4	Genipa_americana	Rubiaceae	36.5	11.6183	9
E	Darora	Mata Ciliar	2	5	Cassia_moschata	Fabaceae	43	13.6873	8
E	Darora	Mata Ciliar	2	6	Swartzia	Fabaceae	31	9.86758	6
E	Darora	Mata Ciliar	2	7	Cassia_moschata	Fabaceae	30+106	35.0661	8
E	Darora	Mata Ciliar	2	8	Myrcia_sp	Myrtaceae	37.5	11.9366	6
E	Darora	Mata Ciliar	2	9	Swartzia	Fabaceae	55	17.507	5
E	Darora	Mata Ciliar	2	10	Copaifera_pubiflora	Fabaceae	143	45.5182	16
E	Darora	Mata Ciliar	2	11	Copaifera_pubiflora	Fabaceae	95	30.2394	16
E	Darora	Mata Ciliar	2	12	Sorocea _duckei	Moraceae	35+15+24	14.3275	8
E	Darora	Mata Ciliar	3	13	Genipa_americana	Rubiaceae	33	10.5042	7
E	Darora	Mata Ciliar	3	14	Cassia_sp	Fabaceae	49	15.5971	8
E	Darora	Mata Ciliar	4	15	Curatella_americana	Dilleniaceae	76+74	33.7649	5
E	Darora	Mata Ciliar	4	16	Erythroxylum_suberosum	Erythroxylaceae	41	13.0507	5
E	Darora	Mata Ciliar	4	17	Curatella_americana	Dilleniaceae	49.5	15.7563	6
E	Darora	Mata Ciliar	4	18	Curatella_americana	Dilleniaceae	35+27	14.0706	6
E	Darora	Mata Ciliar	5	19	Curatella_americana	Dilleniaceae	66+30	23.0769	7
E	Darora	Mata Ciliar	5	20	Genipa_americana	Rubiaceae	33+12	11.1772	7
E	Darora	Mata Ciliar	5	21	Curatella_americana	Dilleniaceae	42	13.369	5
E	Darora	Mata Ciliar	5	22	Curatella_americana	Dilleniaceae	32	10.1859	6
E	Darora	Mata Ciliar	7	23	Curatella_americana	Dilleniaceae	38	12.0957	5
E	Darora	Mata Ciliar	8	24	Cassia_sp	Fabaceae	34.5	10.9817	9
E	Darora	Mata Ciliar	8	25	Cassia_sp	Fabaceae	32	10.1859	8
E	Darora	Mata Ciliar	9	26	Cassia_sp	Fabaceae	31	9.86758	8
E	Darora	Mata Ciliar	9	27	Cassia_sp	Fabaceae	45	14.3239	9
E	Darora	Mata Ciliar	9	28	Cassia_sp	Fabaceae	51	16.2338	9
E	Darora	Mata Ciliar	9	29	Cassia_sp	Fabaceae	31	9.86758	9
E	Darora	Mata Ciliar	9	30	Cassia_sp	Fabaceae	47	14.9605	9
E	Darora	Mata Ciliar	9	31	Genipa_americana	Rubiaceae	57+17	18.9334	9
E	Darora	Mata Ciliar	9	32	Cassia_sp	Fabaceae	34	10.8225	8
E	Darora	Mata Ciliar	9	33	Cassia_sp	Fabaceae	32	10.1859	8
E	Darora	Mata Ciliar	9	34	Cassia_sp	Fabaceae	36	11.4591	8
E	Darora	Mata Ciliar	9	35	Cassia_sp	Fabaceae	35	11.1408	8
E	Darora	Mata Ciliar	10	36	Cassia_sp	Fabaceae	31	9.86758	8
E	Darora	Mata Ciliar	10	37	Cassia_sp	Fabaceae	32	10.1859	9
E	Darora	Mata Ciliar	10	38	Cassia_sp	Fabaceae	33	10.5042	7
E	Darora	Mata Ciliar	10	39	Cassia_sp	Fabaceae	34	10.8225	8
E	Darora	Mata Ciliar	10	40	Sorocea _duckei	Moraceae	62	19.7352	9
F	Darora	Mata Ciliar	11	1	Etabalia_sp	Fabaceae	56+56+48,5+22	30.3786	12
F	Darora	Mata Ciliar	11	2	Cynometra_bauhinifolia	Fabaceae	110	35.014	12
F	Darora	Mata Ciliar	11	3	Vitex_cimosa	Verbenaceae	61+190	63.5194	13
F	Darora	Mata Ciliar	11	4	Etabalia_sp	Fabaceae	75	23.8732	10
F	Darora	Mata Ciliar	12	5	Bunchosia_sp	Malpighiaceae	40+47	19.6452	10
F	Darora	Mata Ciliar	12	6	Bunchosia_sp	Malpighiaceae	92	29.2844	13
F	Darora	Mata Ciliar	12	7	Vitex_cimosa	Verbenaceae	107	34.0591	13
F	Darora	Mata Ciliar	12	8	Genipa_americana	Rubiaceae	59	18.7802	13
F	Darora	Mata Ciliar	12	9	Eschweilera_sp	Lecythidaceae	37	11.7774	11
F	Darora	Mata Ciliar	12	10	Vitex_cimosa	Verbenaceae	187	59.5238	15
F	Darora	Mata Ciliar	12	11	Vitex_cimosa	Verbenaceae	111	35.3323	15
F	Darora	Mata Ciliar	13	12	Eugenia_sp	Myrtaceae	42+75	27.3617	9
F	Darora	Mata Ciliar	13	13	Etabalia_sp	Fabaceae	50+78	29.4914	6
F	Darora	Mata Ciliar	13	14	Cynometra_bauhinifolia	Fabaceae	65+29	22.656	9
F	Darora	Mata Ciliar	14	15	Etabalia_sp	Fabaceae	105	33.4225	6
F	Darora	Mata Ciliar	14	16	Andira_sp	Fabaceae	40+57,5+29+60+49	34.5014	8
F	Darora	Mata Ciliar	14	17	Vitex_cimosa	Verbenaceae	129+96	51.1846	15
F	Darora	Mata Ciliar	15	18	Eschweilera_sp	Lecythidaceae	31	9.86758	5
F	Darora	Mata Ciliar	15	19	Cynometra_bauhinifolia	Fabaceae	130+66	46.4078	12
F	Darora	Mata Ciliar	15	20	Eschweilera_sp	Lecythidaceae	79	25.1464	14
F	Darora	Mata Ciliar	15	21	Vitex_cimosa	Verbenaceae	150	47.7464	12
F	Darora	Mata Ciliar	15	22	Genipa_americana	Rubiaceae	49	15.5971	11
F	Darora	Mata Ciliar	16	23	Ceiba_sp	Malvaceae	37.5	11.9366	8
F	Darora	Mata Ciliar	16	24	Genipa_americana	Rubiaceae	42	13.369	10
F	Darora	Mata Ciliar	16	25	Etabalia_sp	Fabaceae	32	10.1859	6
F	Darora	Mata Ciliar	17	26	Etabalia_sp	Fabaceae	88+104+43	45.4738	10
F	Darora	Mata Ciliar	17	27	Etabalia_sp	Fabaceae	137	43.6084	13
F	Darora	Mata Ciliar	17	28	Andira_sp	Fabaceae	63+55	26.6203	8
F	Darora	Mata Ciliar	17	29	Etabalia_sp	Fabaceae	55	17.507	11
F	Darora	Mata Ciliar	17	30	Etabalia_sp	Fabaceae	48+26	17.3763	12
F	Darora	Mata Ciliar	17	31	Genipa_americana	Rubiaceae	47	14.9605	12
F	Darora	Mata Ciliar	17	32	Etabalia_sp	Fabaceae	80	25.4647	10
F	Darora	Mata Ciliar	17	33	Genipa_americana	Rubiaceae	58	18.4619	12
F	Darora	Mata Ciliar	17	34	Vitex_cimosa	Verbenaceae	72+64+69	37.718	12
F	Darora	Mata Ciliar	18	35	Etabalia_sp	Fabaceae	45+54+87+111	50.1588	14
F	Darora	Mata Ciliar	18	36	Bunchosia_sp	Malpighiaceae	51	16.2338	10
F	Darora	Mata Ciliar	18	37	Etabalia_sp	Fabaceae	37+104	35.1369	8
F	Darora	Mata Ciliar	18	38	Vitex_cimosa	Verbenaceae	43	13.6873	10
F	Darora	Mata Ciliar	18	39	Spondias_mombim	Anacardiaceae	93	29.6028	14
F	Darora	Mata Ciliar	18	40	Spondias_mombim	Anacardiaceae	64	20.3718	12
F	Darora	Mata Ciliar	19	41	Bixa_arborea	Bixaceae	38	12.0957	12
F	Darora	Mata Ciliar	19	42	Etabalia_sp	Fabaceae	32	10.1859	11
F	Darora	Mata Ciliar	19	43	Spondias_mombim	Anacardiaceae	95	30.2394	12
F	Darora	Mata Ciliar	19	44	Eugenia_sp	Myrtaceae	37	11.7774	11
F	Darora	Mata Ciliar	19	45	Cynometra_bauhinifolia	Fabaceae	58+32	21.0855	8
F	Darora	Mata Ciliar	19	46	Etabalia_sp	Fabaceae	182	57.9323	14
F	Darora	Mata Ciliar	20	47	Etabalia_sp	Fabaceae	99	31.5126	14
F	Darora	Mata Ciliar	20	48	Etabalia_sp	Fabaceae	106	33.7408	12
F	Darora	Mata Ciliar	20	49	Cynometra_bauhinifolia	Fabaceae	35	11.1408	10
F	Darora	Mata Ciliar	20	50	Cynometra_bauhinifolia	Fabaceae	37	11.7774	5
F	Darora	Mata Ciliar	20	51	Etabalia_sp	Fabaceae	77	24.5098	10
F	Darora	Mata Ciliar	20	52	Etabalia_sp	Fabaceae	47+68	26.3121	10
F	Darora	Mata Ciliar	20	53	Hydrochorea corymbosa	Fabaceae	110	35.014	14
F	Darora	Mata Ciliar	20	54	Ceiba_sp	Malvaceae	46	14.6422	12
F	Darora	Mata Ciliar	20	55	Rupretchia	Erythroxylaceae	77+50	29.2239	12
F	Darora	Mata Ciliar	20	56	Cynometra_bauhinifolia	Fabaceae	46+30+23	18.9521	8
F	Darora	Mata Ciliar	20	57	Genipa_americana	Rubiaceae	38	12.0957	10
F	Darora	Mata Ciliar	20	58	Etabalia_sp	Fabaceae	106	33.7408	12
F	Darora	Mata Ciliar	20	59	Etabalia_sp	Fabaceae	92	29.2844	12
F	Darora	Mata Ciliar	20	60	Cynometra_bauhinifolia	Fabaceae	89	28.3295	12
F	Darora	Mata Ciliar	20	61	Bunchosia_sp	Malpighiaceae	53+18+42	22.2749	10
G	Darora	Lavrado	1	1	Byrsonima_crassifolia	Malpighiaceae	7	2.22816	0.4
G	Darora	Lavrado	1	2	Byrsonima_coccolobifolia	Malpighiaceae	27	8.59435	1.3
G	Darora	Lavrado	1	3	Byrsonima_coccolobifolia	Malpighiaceae	12,5+19	7.23936	1.6
G	Darora	Lavrado	1	4	Byrsonima_crassifolia	Malpighiaceae	37	11.7774	2
G	Darora	Lavrado	1	5	Byrsonima_coccolobifolia	Malpighiaceae	22	7.0028	1.3
G	Darora	Lavrado	1	6	Byrsonima_verbascifolia	Malpighiaceae	9	2.86478	0.2
G	Darora	Lavrado	1	7	Byrsonima_crassifolia	Malpighiaceae	25	7.95773	0.5
G	Darora	Lavrado	1	8	Byrsonima_crassifolia	Malpighiaceae	23+20	9.70193	1.5
G	Darora	Lavrado	1	9	Byrsonima_coccolobifolia	Malpighiaceae	6	1.90985	0.2
G	Darora	Lavrado	1	10	Byrsonima_coccolobifolia	Malpighiaceae	19	6.04787	1.5
G	Darora	Lavrado	1	11	Byrsonima_crassifolia	Malpighiaceae	14	4.45633	1.4
G	Darora	Lavrado	1	12	Byrsonima_crassifolia	Malpighiaceae	6	1.90985	1.5
G	Darora	Lavrado	1	13	Byrsonima_crassifolia	Malpighiaceae	6	1.90985	0.5
G	Darora	Lavrado	1	14	Byrsonima_crassifolia	Malpighiaceae	7	2.22816	0.5
G	Darora	Lavrado	1	15	Curatella_americana	Dilleniaceae	57	18.1436	3
G	Darora	Lavrado	1	16	Byrsonima_coccolobifolia	Malpighiaceae	29	9.23097	2
G	Darora	Lavrado	1	17	Byrsonima_coccolobifolia	Malpighiaceae	22	7.0028	2
G	Darora	Lavrado	1	18	Bowdichia_virgilioides	Fabaceae	7	2.22816	0.2
G	Darora	Lavrado	1	19	Byrsonima_coccolobifolia	Malpighiaceae	11	3.5014	0.3
G	Darora	Lavrado	2	20	Byrsonima_crassifolia	Malpighiaceae	30	9.54927	1.5
G	Darora	Lavrado	2	21	Byrsonima_crassifolia	Malpighiaceae	32	10.1859	2
G	Darora	Lavrado	2	22	Byrsonima_coccolobifolia	Malpighiaceae	17	5.41126	1.5
G	Darora	Lavrado	2	23	Byrsonima_crassifolia	Malpighiaceae	16	5.09295	1.5
G	Darora	Lavrado	2	24	Byrsonima_coccolobifolia	Malpighiaceae	34	10.8225	2
G	Darora	Lavrado	3	25	Byrsonima_coccolobifolia	Malpighiaceae	38	12.0957	3
G	Darora	Lavrado	3	26	Himatanthus_articulatus	Apocynaceae	9	2.86478	1.5
G	Darora	Lavrado	3	27	Byrsonima_coccolobifolia	Malpighiaceae	11	3.5014	0.5
G	Darora	Lavrado	3	28	Byrsonima_coccolobifolia	Malpighiaceae	8+11	4.32948	1
G	Darora	Lavrado	3	29	Byrsonima_crassifolia	Malpighiaceae	34	10.8225	1.6
G	Darora	Lavrado	3	30	Byrsonima_crassifolia	Malpighiaceae	15	4.77464	1.5
G	Darora	Lavrado	3	31	Byrsonima_coccolobifolia	Malpighiaceae	24	7.63942	1.6
G	Darora	Lavrado	3	32	Byrsonima_crassifolia	Malpighiaceae	28	8.91266	0.4
G	Darora	Lavrado	3	33	Himatanthus_articulatus	Apocynaceae	10	3.18309	1.3
G	Darora	Lavrado	3	34	Byrsonima_crassifolia	Malpighiaceae	17	5.41126	1.3
G	Darora	Lavrado	3	35	Byrsonima_verbascifolia	Malpighiaceae	12	3.81971	1.5
G	Darora	Lavrado	3	36	Byrsonima_crassifolia	Malpighiaceae	17	5.41126	1.5
G	Darora	Lavrado	3	37	Byrsonima_coccolobifolia	Malpighiaceae	33	10.5042	2
G	Darora	Lavrado	3	38	Byrsonima_crassifolia	Malpighiaceae	43	13.6873	2.5
G	Darora	Lavrado	3	39	Byrsonima_coccolobifolia	Malpighiaceae	36	11.4591	2
G	Darora	Lavrado	3	40	Byrsonima_coccolobifolia	Malpighiaceae	13	4.13802	0.3
G	Darora	Lavrado	4	41	Byrsonima_crassifolia	Malpighiaceae	40	12.7324	3
G	Darora	Lavrado	4	42	Curatella_americana	Dilleniaceae	20	6.36618	1.6
G	Darora	Lavrado	4	43	Byrsonima_coccolobifolia	Malpighiaceae	33	10.5042	1.5
G	Darora	Lavrado	4	44	Byrsonima_crassifolia	Malpighiaceae	51	16.2338	2
G	Darora	Lavrado	4	45	Byrsonima_crassifolia	Malpighiaceae	28	8.91266	1.6
G	Darora	Lavrado	4	46	Byrsonima_verbascifolia	Malpighiaceae	9	2.86478	0.2
G	Darora	Lavrado	4	47	Byrsonima_verbascifolia	Malpighiaceae	7	2.22816	0.3
G	Darora	Lavrado	4	48	Byrsonima_crassifolia	Malpighiaceae	14	4.45633	1.5
G	Darora	Lavrado	4	49	Byrsonima_crassifolia	Malpighiaceae	25	7.95773	1.6
G	Darora	Lavrado	4	50	Byrsonima_verbascifolia	Malpighiaceae	11	3.5014	0.2
G	Darora	Lavrado	4	51	Byrsonima_crassifolia	Malpighiaceae	9	2.86478	0.4
G	Darora	Lavrado	4	52	Byrsonima_crassifolia	Malpighiaceae	7	2.22816	0.4
G	Darora	Lavrado	5	53	Byrsonima_coccolobifolia	Malpighiaceae	50	15.9155	3
G	Darora	Lavrado	5	54	Byrsonima_crassifolia	Malpighiaceae	29	9.23097	2
G	Darora	Lavrado	5	55	Byrsonima_crassifolia	Malpighiaceae	16	5.09295	1.5
G	Darora	Lavrado	5	56	Byrsonima_crassifolia	Malpighiaceae	15	4.77464	1.5
G	Darora	Lavrado	5	57	Byrsonima_coccolobifolia	Malpighiaceae	16	5.09295	1.4
G	Darora	Lavrado	5	58	Byrsonima_crassifolia	Malpighiaceae	26	8.27604	1.5
G	Darora	Lavrado	6	59	Byrsonima_crassifolia	Malpighiaceae	34+31	14.6457	2.3
G	Darora	Lavrado	6	60	Byrsonima_crassifolia	Malpighiaceae	16	5.09295	1.4
G	Darora	Lavrado	6	61	Byrsonima_coccolobifolia	Malpighiaceae	20	6.36618	1.5
G	Darora	Lavrado	6	62	Byrsonima_crassifolia	Malpighiaceae	8	2.54647	0.2
G	Darora	Lavrado	6	63	Byrsonima_crassifolia	Malpighiaceae	18	5.72956	1.5
G	Darora	Lavrado	6	64	Byrsonima_coccolobifolia	Malpighiaceae	7	2.22816	0.5
G	Darora	Lavrado	6	65	Byrsonima_crassifolia	Malpighiaceae	39	12.4141	2.3
G	Darora	Lavrado	7	66	Byrsonima_verbascifolia	Malpighiaceae	15	4.77464	0.2
G	Darora	Lavrado	7	67	Byrsonima_crassifolia	Malpighiaceae	10	3.18309	1
G	Darora	Lavrado	7	68	Byrsonima_crassifolia	Malpighiaceae	9	2.86478	0.4
G	Darora	Lavrado	7	69	Byrsonima_crassifolia	Malpighiaceae	7	2.22816	0.2
G	Darora	Lavrado	7	70	Byrsonima_crassifolia	Malpighiaceae	8	2.54647	0.4
G	Darora	Lavrado	7	71	Byrsonima_coccolobifolia	Malpighiaceae	24	7.63942	1.5
G	Darora	Lavrado	7	72	Byrsonima_coccolobifolia	Malpighiaceae	26	8.27604	1.66
G	Darora	Lavrado	7	73	Curatella_americana	Dilleniaceae	46	14.6422	3
G	Darora	Lavrado	7	74	Byrsonima_coccolobifolia	Malpighiaceae	14	4.45633	0.5
G	Darora	Lavrado	7	75	Byrsonima_crassifolia	Malpighiaceae	10	3.18309	0.5
G	Darora	Lavrado	7	76	Byrsonima_crassifolia	Malpighiaceae	9	2.86478	0.5
G	Darora	Lavrado	7	77	Byrsonima_crassifolia	Malpighiaceae	8	2.54647	0.5
G	Darora	Lavrado	7	78	Byrsonima_crassifolia	Malpighiaceae	12	3.81971	0.4
G	Darora	Lavrado	7	79	Byrsonima_crassifolia	Malpighiaceae	14	4.45633	0.4
G	Darora	Lavrado	7	80	Byrsonima_coccolobifolia	Malpighiaceae	6	1.90985	0.3
G	Darora	Lavrado	7	81	Byrsonima_verbascifolia	Malpighiaceae	7	2.22816	0.2
G	Darora	Lavrado	8	82	Byrsonima_coccolobifolia	Malpighiaceae	16	5.09295	1.5
G	Darora	Lavrado	8	83	Byrsonima_verbascifolia	Malpighiaceae	10	3.18309	0.2
G	Darora	Lavrado	8	84	Byrsonima_crassifolia	Malpighiaceae	6+6,5	2.81574	0.4
G	Darora	Lavrado	8	85	Byrsonima_crassifolia	Malpighiaceae	14	4.45633	1.6
G	Darora	Lavrado	8	86	Curatella_americana	Dilleniaceae	49	15.5971	3
G	Darora	Lavrado	8	87	Byrsonima_coccolobifolia	Malpighiaceae	25.5	8.11688	1.9
G	Darora	Lavrado	8	88	Byrsonima_crassifolia	Malpighiaceae	12	3.81971	1.6
G	Darora	Lavrado	8	89	Byrsonima_crassifolia	Malpighiaceae	40	12.7324	3
G	Darora	Lavrado	8	90	Byrsonima_crassifolia	Malpighiaceae	14	4.45633	0.4
G	Darora	Lavrado	9	91	Byrsonima_verbascifolia	Malpighiaceae	17	5.41126	1.3
G	Darora	Lavrado	9	92	Byrsonima_coccolobifolia	Malpighiaceae	15	4.77464	1.4
G	Darora	Lavrado	9	93	Byrsonima_coccolobifolia	Malpighiaceae	14	4.45633	1.5
G	Darora	Lavrado	9	94	Byrsonima_verbascifolia	Malpighiaceae	7	2.22816	0.2
G	Darora	Lavrado	9	95	Byrsonima_coccolobifolia	Malpighiaceae	22	7.0028	1.6
G	Darora	Lavrado	9	96	Byrsonima_coccolobifolia	Malpighiaceae	9	2.86478	1.5
G	Darora	Lavrado	9	97	Byrsonima_crassifolia	Malpighiaceae	19	6.04787	1.6
G	Darora	Lavrado	9	98	Byrsonima_coccolobifolia	Malpighiaceae	11	3.5014	1.4
G	Darora	Lavrado	10	99	Byrsonima_coccolobifolia	Malpighiaceae	35	11.1408	2
G	Darora	Lavrado	10	100	Byrsonima_coccolobifolia	Malpighiaceae	34	10.8225	2
G	Darora	Lavrado	10	101	Byrsonima_coccolobifolia	Malpighiaceae	16	5.09295	1
G	Darora	Lavrado	10	102	Byrsonima_coccolobifolia	Malpighiaceae	41	13.0507	2
G	Darora	Lavrado	10	103	Byrsonima_crassifolia	Malpighiaceae	25	7.95773	1.25
G	Darora	Lavrado	10	104	Byrsonima_crassifolia	Malpighiaceae	11	3.5014	1.5
G	Darora	Lavrado	10	105	Byrsonima_crassifolia	Malpighiaceae	7	2.22816	0.5
G	Darora	Lavrado	10	106	Byrsonima_coccolobifolia	Malpighiaceae	8+7	3.38368	0.5
G	Darora	Lavrado	10	107	Byrsonima_verbascifolia	Malpighiaceae	10	3.18309	0.2
G	Darora	Lavrado	10	108	Byrsonima_crassifolia	Malpighiaceae	13	4.13802	0.3
G	Darora	Lavrado	10	109	Byrsonima_coccolobifolia	Malpighiaceae	41	13.0507	2
G	Darora	Lavrado	10	110	Byrsonima_crassifolia	Malpighiaceae	11	3.5014	1.5
G	Darora	Lavrado	10	111	Byrsonima_crassifolia	Malpighiaceae	17	5.41126	1.9
G	Darora	Lavrado	10	112	Byrsonima_crassifolia	Malpighiaceae	15	4.77464	1.5
G	Darora	Lavrado	10	113	Curatella_americana	Dilleniaceae	24	7.63942	2
G	Darora	Lavrado	10	114	Byrsonima_crassifolia	Malpighiaceae	19	6.04787	3
G	Darora	Lavrado	10	115	Byrsonima_crassifolia	Malpighiaceae	10+11	4.73202	3
G	Darora	Lavrado	10	116	Byrsonima_coccolobifolia	Malpighiaceae	6	1.90985	0.5
G	Darora	Lavrado	10	117	Byrsonima_crassifolia	Malpighiaceae	10.5	3.34225	1.5
G	Darora	Lavrado	10	118	Byrsonima_crassifolia	Malpighiaceae	32	10.1859	1.5
H	Darora	Ilha de Mata	1	1	Vitex_schomburgkiana	Verbenaceae	62+88	34.2653	10
H	Darora	Ilha de Mata	1	2	Bowdichia_virgilioides	Fabaceae	35	11.1408	5
H	Darora	Ilha de Mata	1	3	Byrsonima_crassifolia	Malpighiaceae	32	10.1859	4
H	Darora	Ilha de Mata	1	4	Bowdichia_virgilioides	Fabaceae	42	13.369	8
H	Darora	Ilha de Mata	1	5	Godmania_aesculifolia	Bignoniaceae	55	17.507	6
H	Darora	Ilha de Mata	2	6	Curatella_americana	Dilleniaceae	69	21.9633	8
H	Darora	Ilha de Mata	3	7	Genipa_americana	Rubiaceae	61	19.4169	12
H	Darora	Ilha de Mata	3	8	Genipa_americana	Rubiaceae	34	10.8225	7
H	Darora	Ilha de Mata	3	9	Anadenanthera_peregrina	Fabaceae	41	13.0507	8
H	Darora	Ilha de Mata	3	10	Curatella_americana	Dilleniaceae	90	28.6478	8
H	Darora	Ilha de Mata	3	11	Curatella_americana	Dilleniaceae	79+52	30.1051	8
H	Darora	Ilha de Mata	3	12	Curatella_americana	Dilleniaceae	77	24.5098	8
H	Darora	Ilha de Mata	3	13	Himatanthus_articulatus	Apocynaceae	81	25.783	13
H	Darora	Ilha de Mata	3	14	Curatella_americana	Dilleniaceae	78	24.8281	10
H	Darora	Ilha de Mata	3	15	Curatella_americana	Dilleniaceae	51	16.2338	5
H	Darora	Ilha de Mata	3	16	Curatella_americana	Dilleniaceae	72	22.9183	7
H	Darora	Ilha de Mata	4	17	Curatella_americana	Dilleniaceae	56	17.8253	9
H	Darora	Ilha de Mata	4	18	Curatella_americana	Dilleniaceae	66	21.0084	10
H	Darora	Ilha de Mata	4	19	Erythroxylum_suberosum	Erythroxylaceae	33	10.5042	10
H	Darora	Ilha de Mata	4	20	Curatella_americana	Dilleniaceae	52	16.5521	12
H	Darora	Ilha de Mata	5	21	Bowdichia_virgilioides	Fabaceae	76	24.1915	3
H	Darora	Ilha de Mata	5	22	Anadenanthera_peregrina	Fabaceae	85	27.0563	11
H	Darora	Ilha de Mata	5	23	Godmania_aesculifolia	Bignoniaceae	81	25.783	9
H	Darora	Ilha de Mata	5	24	Bowdichia_virgilioides	Fabaceae	28+39	15.2822	8
H	Darora	Ilha de Mata	5	25	Anadenanthera_peregrina	Fabaceae	31	9.86758	7
H	Darora	Ilha de Mata	5	26	Erythroxylum_suberosum	Erythroxylaceae	67	21.3267	8
H	Darora	Ilha de Mata	5	27	Eugenia_sp	Myrtaceae	65	20.6901	10
H	Darora	Ilha de Mata	5	28	Eugenia_sp	Myrtaceae	72+31	24.9523	11
H	Darora	Ilha de Mata	5	29	Copaifera_pubiflora	Fabaceae	146	46.4731	12
H	Darora	Ilha de Mata	5	30	Vitex_schomburgkiana	Verbenaceae	96	30.5577	12
H	Darora	Ilha de Mata	5	31	Eugenia_sp	Myrtaceae	70	22.2816	11
H	Darora	Ilha de Mata	5	32	Erythroxylum_suberosum	Erythroxylaceae	31	9.86758	6
H	Darora	Ilha de Mata	5	33	Vitex_schomburgkiana	Verbenaceae	124	39.4703	12
H	Darora	Ilha de Mata	6	34	Curatella_americana	Dilleniaceae	50	15.9155	13
H	Darora	Ilha de Mata	6	35	Curatella_americana	Dilleniaceae	57	18.1436	12
H	Darora	Ilha de Mata	6	36	Curatella_americana	Dilleniaceae	84	26.738	12
H	Darora	Ilha de Mata	6	37	Curatella_americana	Dilleniaceae	58	18.4619	9
H	Darora	Ilha de Mata	6	38	Curatella_americana	Dilleniaceae	87	27.6929	13
H	Darora	Ilha de Mata	7	39	Curatella_americana	Dilleniaceae	52	16.5521	10
H	Darora	Ilha de Mata	7	40	Curatella_americana	Dilleniaceae	31	9.86758	4
H	Darora	Ilha de Mata	8	41	Copaifera_pubiflora	Fabaceae	60	19.0985	16
H	Darora	Ilha de Mata	8	42	Vitex_schomburgkiana	Verbenaceae	65	20.6901	12
H	Darora	Ilha de Mata	8	43	Genipa_americana	Rubiaceae	53	16.8704	12
H	Darora	Ilha de Mata	8	44	Eugenia_sp	Myrtaceae	36	11.4591	5
H	Darora	Ilha de Mata	8	45	Vitex_schomburgkiana	Verbenaceae	76	24.1915	16
H	Darora	Ilha de Mata	8	46	Machaerium_aculeatum	Fabaceae	59.5	18.9394	16
H	Darora	Ilha de Mata	8	47	Vitex_schomburgkiana	Verbenaceae	41	13.0507	16
H	Darora	Ilha de Mata	8	48	Erythroxylum_suberosum	Erythroxylaceae	40	12.7324	10
H	Darora	Ilha de Mata	8	49	Copaifera_pubiflora	Fabaceae	133	42.3351	18
H	Darora	Ilha de Mata	8	50	Copaifera_pubiflora	Fabaceae	78	24.8281	18
H	Darora	Ilha de Mata	8	51	Eugenia_sp	Myrtaceae	40	12.7324	5
H	Darora	Ilha de Mata	8	52	Vitex_schomburgkiana	Verbenaceae	104+101	46.1462	18
H	Darora	Ilha de Mata	8	53	Vitex_schomburgkiana	Verbenaceae	125	39.7886	18
H	Darora	Ilha de Mata	8	54	Himatanthus_articulatus	Apocynaceae	47	14.9605	12
H	Darora	Ilha de Mata	8	55	Erythroxylum_suberosum	Erythroxylaceae	34	10.8225	8
H	Darora	Ilha de Mata	8	56	Erythroxylum_suberosum	Erythroxylaceae	36	11.4591	8
H	Darora	Ilha de Mata	9	57	Erythroxylum_suberosum	Erythroxylaceae	37.5	11.9366	8
H	Darora	Ilha de Mata	9	58	Erythroxylum_suberosum	Erythroxylaceae	36	11.4591	6
H	Darora	Ilha de Mata	9	59	Erythroxylum_suberosum	Erythroxylaceae	41	13.0507	8
H	Darora	Ilha de Mata	10	60	Vitex_schomburgkiana	Verbenaceae	76+55+59	35.2764	16
H	Darora	Ilha de Mata	10	61	Eugenia_sp	Myrtaceae	52+25	24.0929	10
H	Darora	Ilha de Mata	10	62	Xylosma benthamii	Salicaceae	35+43+33	20.5378	10
H	Darora	Ilha de Mata	10	63	Vitex_schomburgkiana	Verbenaceae	41	13.0507	9
H	Darora	Ilha de Mata	10	64	Curatella_americana	Dilleniaceae	76	24.1915	12
H	Darora	Ilha de Mata	10	65	Godmania_aesculifolia	Bignoniaceae	38	12.0957	8
H	Darora	Ilha de Mata	10	66	Anadenanthera_peregrina	Fabaceae	39	12.4141	12
